# Supplementary material for: Children and Young People’s Health Partnership Evelina London Model of Care: economic evaluation protocol of a complex system change
Source: PubMed Central journal article supplement — BMJ Open. 2021 Nov 24;11(11):e047085. doi: 10.1136/bmjopen-2020-047085 (PMC8614147; doi:10.1136/bmjopen-2020-047085), 2021-11-24

# BMJ Open

BMJ Open is committed to open peer review. As part of this commitment we make the peer review history of every article we publish publicly available.

When an article is published we post the peer reviewers' comments and the authors' responses online. We also post the versions of the paper that were used during peer review. These are the versions that the peer review comments apply to.

The versions of the paper that follow are the versions that were submitted during the peer review process. They are not the versions of record or the final published versions. They should not be cited or distributed as the published version of this manuscript.

BMJ Open is an open access journal and the full, final, typeset and author-corrected version of record of the manuscript is available on our site with no access controls, subscription charges or pay-per-view fees (<http://bmjopen.bmj.com>).

If you have any questions on BMJ Open's open peer review process please email [info.bmjopen@bmj.com](mailto:info.bmjopen@bmj.com)

# BMJ Open

## The Children and Young People's Health Partnership Evelina London Model of Care: economic evaluation protocol of a complex system change

|                               |                                                                                                                                                                                                                                                                                                                                                                                                                                                                                                                 |
|-------------------------------|-----------------------------------------------------------------------------------------------------------------------------------------------------------------------------------------------------------------------------------------------------------------------------------------------------------------------------------------------------------------------------------------------------------------------------------------------------------------------------------------------------------------|
| Journal:                      | <i>BMJ Open</i>                                                                                                                                                                                                                                                                                                                                                                                                                                                                                                 |
| Manuscript ID                 | bmjopen-2020-047085                                                                                                                                                                                                                                                                                                                                                                                                                                                                                             |
| Article Type:                 | Protocol                                                                                                                                                                                                                                                                                                                                                                                                                                                                                                        |
| Date Submitted by the Author: | 19-Nov-2020                                                                                                                                                                                                                                                                                                                                                                                                                                                                                                     |
| Complete List of Authors:     | Soley-Bori, Marina; King's College London, Lingam, Raghu; University of New South Wales, School of Women's and Children's Health<br>Satherley, Rose-Marie; King's College London, Forman, Julia; Kings College London , Department of Women's and Children's Health<br>Cecil, E; King's College London, Department of Women's and Children's Health<br>Fox-Rushby, Julia; Kings College London, Population Health Sciences<br>Wolfe, Ingrid; King's College London, Department of Women's and Children's Health |
| Keywords:                     | HEALTH ECONOMICS, PAEDIATRICS, Health policy < HEALTH SERVICES ADMINISTRATION & MANAGEMENT                                                                                                                                                                                                                                                                                                                                                                                                                      |
|                               |                                                                                                                                                                                                                                                                                                                                                                                                                                                                                                                 |

SCHOLARONE™  
Manuscripts

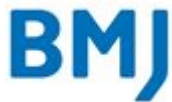

I, the Submitting Author has the right to grant and does grant on behalf of all authors of the Work (as defined in the below author licence), an exclusive licence and/or a non-exclusive licence for contributions from authors who are: i) UK Crown employees; ii) where BMJ has agreed a CC-BY licence shall apply, and/or iii) in accordance with the terms applicable for US Federal Government officers or employees acting as part of their official duties; on a worldwide, perpetual, irrevocable, royalty-free basis to BMJ Publishing Group Ltd ("BMJ") its licensees and where the relevant Journal is co-owned by BMJ to the co-owners of the Journal, to publish the Work in this journal and any other BMJ products and to exploit all rights, as set out in our [licence](#).

The Submitting Author accepts and understands that any supply made under these terms is made by BMJ to the Submitting Author unless you are acting as an employee on behalf of your employer or a postgraduate student of an affiliated institution which is paying any applicable article publishing charge ("APC") for Open Access articles. Where the Submitting Author wishes to make the Work available on an Open Access basis (and intends to pay the relevant APC), the terms of reuse of such Open Access shall be governed by a Creative Commons licence – details of these licences and which [Creative Commons](#) licence will apply to this Work are set out in our licence referred to above.

Other than as permitted in any relevant BMJ Author's Self Archiving Policies, I confirm this Work has not been accepted for publication elsewhere, is not being considered for publication elsewhere and does not duplicate material already published. I confirm all authors consent to publication of this Work and authorise the granting of this licence.

1  
2  
3 **The Children and Young People's Health Partnership Evelina London Model of Care: economic**  
4 **evaluation protocol of a complex system change**  
5  
6  
7

8 **Authors**  
9

10 Marina Soley-Bori<sup>1</sup>, Raghu Lingam<sup>2</sup>, Rose-Marie Satherley<sup>3</sup>, Julia Forman<sup>3</sup>, Lizzie Cecil<sup>3</sup>, and Julia Fox-  
11 Rushby<sup>1\*</sup> & Ingrid Wolfe<sup>3\*</sup>  
12

13 <sup>1</sup> School of Population Health & Environmental Sciences, Kings College London, London, UK.

14 <sup>2</sup> School of Women's and Children's Health, University of New South Wales, Sydney, Australia.

15 <sup>3</sup> Department of Women's and Children's Health, Kings College London, London, UK.

16  
17  
18 \*Joint last authors  
19

20  
21  
22 Corresponding author

23  
24 Dr Marina Soley-Bori  
25 King's College London  
26 Faculty of Life Sciences and Medicine  
27 School of Population Health & Environmental Sciences  
28 Guy's Campus, Great Maze Pond, London SE1 1UL  
29 [Marina.soley\\_bori@kcl.ac.uk](mailto:Marina.soley_bori@kcl.ac.uk)  
30  
31  
32

33 **Abstract**  
34

35 **Introduction:** The Children and Young People's Health Partnership (CYPHP) Evelina London Model of  
36 Care is a new approach to integrated care delivery for children and young people with common  
37 health complaints and chronic conditions. CYPHP includes population health management (services  
38 shaped by data-driven understanding of population and individual needs, applied in this case to  
39 enable proactive case-finding and tailored biopsychosocial care), specialist clinics with  
40 multidisciplinary health teams, and training resources for professionals working with children and  
41 young people. This complex health system strengthening program has been implemented in South  
42 London since April 2018, and will be evaluated using a cluster randomised control trial (cRCT) with  
43 an embedded process evaluation. This protocol describes the within- and beyond-trial economic  
44 evaluation of CYPHP.  
45  
46  
47

48 **Methods and analysis:** The economic evaluation will identify, measure, and value resources and  
49 health outcome impacts of CYPHP compared with Enhanced Usual Care (EUC) from a National Health  
50 Service/ Personal Social Service and a broader societal perspective. The study population includes  
51 90,000 children and young people under 16 years of age in 23 clusters (groups of GP practices) to  
52 assess health service use and costs, with more detailed cost-effectiveness analysis of a targeted  
53 sample of 2,138 children and young people with asthma, eczema, or constipation (tracer conditions).  
54 For the cost-effectiveness analysis, health outcomes will be measured using the Pediatric Quality of  
55 Life Inventory (PedsQL) and quality-adjusted life years (QALYs) using the Child Health Utility measure  
56 (CHU-9D). To account for changes in parental wellbeing, the Warwick-Edinburg Mental Wellbeing  
57 Scale (WEMWBS) will be integrated with QALYs in a cost-benefit analysis. The within-trial economic  
58 evaluation will be complemented by a novel long-term model that expands the analytic horizon to  
59  
60

1  
2  
3 10 years. Analyses will adhere to good practice guidelines and National Institute for Health and Care  
4 Excellence (NICE) public health reference case.  
5

6 **Strength and limitations of this study:**  
7

- 8 • Robust study design: CYPHP will be evaluated using a cluster randomised control trial (cRCT)  
9 with an embedded process evaluation.  
10
- 11 • Multiple analytic perspectives: Both the NHS and Personal Social Services (PSS) perspective  
12 and a societal perspective, accounting for costs falling on parents and schools, will be  
13 adopted.  
14
- 15 • Long analytic horizon: The within-trial economic evaluation will be complemented by a novel  
16 long-term model that expands the analytic horizon to 10 years  
17
- 18 • Impact of Covid-19 on CYPHP service delivery: Differences in the frequency and duration of  
19 each CYPHP component before and after Covid-19 may be observed, which will be assessed  
20 in sensitivity analyses.  
21  
22  
23

24 **Word count:** 293 abstract ; main text 3639  
25

26 Key words: Integrated care, cost-effectiveness, decision modelling, paediatrics  
27

28 **References:** 53  
29

30 **Ethics and dissemination:** Ethics approval obtained from South West-Cornwall & Plymouth Research  
31 Ethics Committee. Results will be submitted for publication in peer-reviewed journals, made  
32 available in briefing papers for local decision-makers, and provided to the local community through  
33 website and public events. Findings will be generalisable to community-based models of care,  
34 especially in urban settings.  
35

36 **Trial registration number:** NCT03461848; Pre-results.  
37

38 **Patient and public involvement:** Patients or the public were involved in the design, or conduct, or  
39 reporting, or dissemination plans of our research  
40  
41  
42  
43  
44  
45  
46  
47  
48  
49  
50  
51  
52  
53  
54  
55  
56  
57  
58  
59  
60

## 1. INTRODUCTION

In 2018 nearly 1400 excess child deaths occurred in the UK compared with Sweden, adjusting for population size (1,2). The UK fares worse than other high-income countries in chronic disease management too. Only 16% of young people in the UK with type 1 diabetes had a glycated haemoglobin A1c under 7.5%, whereas in Germany and Austria this standard was met for 34% of young people (3–5). Poor chronic disease management results in worse health-related quality of life (6,7), and in higher emergency room visits and hospitalisations, which are key healthcare cost drivers (5,8–11). Beyond direct medical costs, poorly controlled chronic conditions result in time lost from school and employment, placing a significant burden on families. For example, the overall cost of caring for children with asthma aged 1–5 years in the 12 months following attendance at hospital for wheeze or asthma is estimated to be 14.53 million GBP (12).

Ensuring good health in childhood is a public health priority both as a rights-based principle (13), and for the health, social, and economic consequences in adulthood (14,15). Notwithstanding the current pandemic, the UK paediatric healthcare delivery model—originally designed to treat acute conditions through high-intensity specialist and inpatient services—now needs to address chronic health care needs and emphasise preventive care. Previous efforts to integrate care for children and young people (CYP) with ongoing conditions have shown potential for improving quality of life and reducing costs, but evidence is limited (16).

The Children and Young People’s Health Partnership (CYPHP) Evelina London Model of Care is an innovative approach to integrated healthcare delivery. It was implemented in April 2018 in two London boroughs (Lambeth and Southwark) where A&E attendance for 0-4 year olds and hospital admissions related to asthma were 16% and 25% higher than the national average, respectively. (17). The CYPHP model aims to strengthen the health system by bridging the gap between primary and secondary care, physical and mental health, and links healthcare with local efforts to tackle the socioeconomic determinants of health. Through coordinated, early intervention, and biopsychosocial care delivered in primary care and community settings, CYPHP has been developed to promote better healthcare and self-management for CYP with common health complaints and chronic conditions(18,19).

CYPHP will be implemented across Southwark and Lambeth in two stages. The staged implementation offers a platform for an opportunistic clustered Randomized Control Trial (cRCT) study design for rigorous evaluation purposes, running alongside a service evaluation reporting regularly to a Partnership Board of commissioner, provider, community organisations, and researchers. In the first CYPHP deployment stage (approximately 3 years), general practices were randomised to either CYPHP (intervention) or Enhanced Usual Care (EUC—control). After three years, CYPHP will be implemented in all of the practices.

The aim of the embedded economic evaluation is, first, to assess the impact of CYPHP compared to EUC on patient-level health care costs from an NHS and Personal Social Service (PSS) perspective for the entire trial population. Second, among children with specific targeted tracer conditions, establish the cost-effectiveness and cost-utility of CYPHP compared to EUC also from an NHS and PSS perspective (NICE reference case). To capture the impact of this complex system change across government sectors, parents, and CYP, a cost-benefit analysis of CYPHP compared to EUC from a societal perspective will also be conducted. The cost-effectiveness of CYPHP compared to EUC beyond the trial duration will also be explored with a state-transition model reflecting natural disease progression for each tracer condition. Existing evaluations of interventions to improve outcomes for children with tracer conditions (such as education initiatives) rarely consider effects

beyond 3 years, which may result in a partial characterization of the intervention effects, and as such this method is a novel application in child health economic research.

Both the population and tracer-conditions analyses aim to inform decisions on the current CYPHP provision in Lambeth and Southwark and throughout the South East London Integrated Care System, as well as its potential expansion to other areas if proven efficient.

## 2. METHODS AND ANALYSIS

### 2.1. Study design

The study design and intervention components are outlined in detailed in our published trial protocol paper (18). In summary, seventy general practices in Southwark and Lambeth were grouped into 23 virtual clusters, occurring naturally for GP-pediatrician co-located clinics. Twelve of these clusters were assigned to the intervention (CYPHP) and 11 clusters to the control group (EUC). For randomization, clusters were stratified by borough, and restricted randomization was carried out to ensure the number of CYP under 16 years, their socioeconomic status (measured by the Index of Multiple Deprivation and Income Deprivation Affecting Children Index), and number of outpatient referrals were similar between the two study arms. The trial population includes CYP under 16 years of age registered to a general practice in Southwark or Lambeth.

### 2.2. Intervention and control arms

The components of CYPHP and EUC are described in **Table 1**. As the intervention arm provides CYPHP on top of EUC, EUC is delivered at all practices. CYPHP offers universal services (available to all CYP, with any childhood condition) and targeted services (available only to CYP with tracer conditions - **asthma, constipation, and/or eczema**). EUC is comprised of several patient self-management support tools for families and resources available to health providers to provide higher quality and more joined-up care for CYP.

Specifically, CYPHP includes:

- CYPHP *universal services*
  - *In-reach clinics*, integrated child health clinics co-delivered by patch-pediatricians and GPs (patch paediatricians are linked to a cluster of general practices) as part of a multidisciplinary CYP health team located in the community.
- CYPHP *targeted services (tracer conditions only)*
  - *Specialist nurse-led team services*, usually delivered by a CYPHP nurse trained in biopsychosocial care (mental health and other specialists are available too if needed) at the CYP's home, during a visit at a community-based clinic, or through a phone call or message. It includes health promotion and self-management advice on tracer conditions. Patients are triaged and care is planned based on a pre-assessment biopsychosocial Health Check and patient records.
  - *Population health management*, where CYP with tracer conditions are sent text messages and a letter from their GP, encouraging them to participate in early intervention and care.

*Multidisciplinary team case-planning* is important for CYPHP delivery, present in both universal and targeted services. It includes case planning and both formal and informal education and training for professionals providing CYPHP. These multidisciplinary sessions for case planning and education and team building are supplemented with *Lunch-and-learn sessions*, where a multidisciplinary group of CYP health professionals, including pediatricians and primary care staff share knowledge, review

cases, create common professional cultures, build and reinforce team working practices. Finally, *specialist team training*, including education and training for primary care, secondary care, or school staff on evidence-based, holistic, and CYP-friendly care, is delivered by CYPHP professionals.

For more details on EUC and CYPHP see Newham and colleagues (2019)(18).

**Table 1. CYPHP and EUC intervention components**

| CYPHP                                                                                                                                                                                                                                                                                                                                                                                                                                                                                                                                                                                                                                                                                                                                                           | EUC                                                                                                                                                                                                                                                                                                                                                                                                                                                                                                                                                                                                                                                                                                                                                                                                                |
|-----------------------------------------------------------------------------------------------------------------------------------------------------------------------------------------------------------------------------------------------------------------------------------------------------------------------------------------------------------------------------------------------------------------------------------------------------------------------------------------------------------------------------------------------------------------------------------------------------------------------------------------------------------------------------------------------------------------------------------------------------------------|--------------------------------------------------------------------------------------------------------------------------------------------------------------------------------------------------------------------------------------------------------------------------------------------------------------------------------------------------------------------------------------------------------------------------------------------------------------------------------------------------------------------------------------------------------------------------------------------------------------------------------------------------------------------------------------------------------------------------------------------------------------------------------------------------------------------|
| <ul style="list-style-type: none"> <li>▪ EUC</li> <li>▪ Universal services:                             <ul style="list-style-type: none"> <li>• 1. In-reach clinics</li> </ul> </li> <li>▪ Specialist (tracer conditions) services:                             <ul style="list-style-type: none"> <li>• 2. Specialist nurse-led service based on Health Check and patient records. Case planning, and informal education and training to support multidisciplinary holistic care.</li> <li>• 3. Specialist team training to primary care, secondary care, or school staff on holistic and CYP-friendly care</li> <li>• 4. Population health management</li> </ul> </li> <li>▪ 5. Multidisciplinary team case-planning and Lunch-and-learn sessions</li> </ul> | <ul style="list-style-type: none"> <li>▪ Universal services:                             <ul style="list-style-type: none"> <li>• Decision support tools for GPs (guidelines and referral guidance for common conditions and minor illnesses) easily accessible during a consultation</li> <li>• Paediatric hotline enabling rapid communication between general practices and paediatricians</li> <li>• School-based emotional resilience building and mental health first aid</li> </ul> </li> <li>▪ Specialist (tracer conditions) services:                             <ul style="list-style-type: none"> <li>▪ Health Check</li> <li>▪ Health Packs for CYP and their parents, comprising condition-specific self-management support, health promotion, and health education material</li> </ul> </li> </ul> |

Note: Tracer conditions=asthma, constipation, and eczema.

CYP access CYPHP universal services via paediatrician or GP referrals. For specialist services, entry sources include direct referrals (from GP, paediatrician, school nurse, or emergency department), self-referrals (availability publicized through community events, posters in GP practices), and proactive case finding (CYP with tracer conditions are sent text messages and a letter from their GP).

**Table 2** describes the expected inputs, frequency, and duration of each CYPHP component. All these data elements will be collected, as actual implementation may differ from protocolised implementation.

**Table 2. Protocolised inputs, frequency, and duration of CYPHP components**

| Intervention component     | Recipient     | Inputs                                                                         | Frequency    | Duration                                           | Comments                                             |
|----------------------------|---------------|--------------------------------------------------------------------------------|--------------|----------------------------------------------------|------------------------------------------------------|
| 1.In-reach clinics         | Patients      | Labour: GP and patch-paediatrician                                             | Once a month | 20-30 min per patient                              | 2-3 hours total                                      |
| 2.Specialist team service  | Patients      | Labour: CYPHP nurse and mental health specialist<br>Capital: children's centre | Varies       | 60 min (home), 30 min (general practice or school) | Service type, duration, and location tailored to CYP |
| 3.Specialist team training | Professionals | Labour: CYPHP nurse, primary care and secondary care staff, school staff       | Varies       | Varies                                             | .                                                    |



|                                                             |                                 |                                                                                               |             |        |                                                                                       |
|-------------------------------------------------------------|---------------------------------|-----------------------------------------------------------------------------------------------|-------------|--------|---------------------------------------------------------------------------------------|
| 4. Population health management                             | Patients                        | Labour: population health clinician, analyst, manager                                         | Varies      | Varies | Data: access, storage, analysis<br>Proactive case finding: costs for sending messages |
| 5. Multidisciplinary team case planning and Lunch-and-learn | Children's Health Professionals | Labour: CYPHP nurse, mental health specialist, paediatrician and GP who works alongside CYPHP | Once a week | 60 min | .                                                                                     |

## 2.3. Economic evaluation within the trial

### 2.3.1. Population-level cost analysis

The goal of the population-level analysis is to assess the impact of CYPHP compared to EUC on healthcare costs of health service use. This analysis will use the whole study population, which includes children and young people, 0-16 years of age, registered with a Southwark or Lambeth GP practice. Health service use will include primary care consultations, visits with paediatricians, hospital outpatient, hospital inpatient, and accident and emergency care during 6 and 12 months. Patient-level costs will be obtained by multiplying unit costs by utilisation. National unit costs for children's services will be obtained from the Unit Costs of Health and Social Care 2019 by the Personal Social Services Resource Unit (20) and the NHS reference costs for 2015-16 (21). Due to the often-skewed cost distribution with a large number of zeros and a long right-hand tail, the modified Park Test and Pregibon Link test will assess the most appropriate distribution and link to calibrate a Generalized linear model (GLM) for costs, for example, with a gamma distribution and a log-link (22,23). The cost model will adjust for a binary variable indicating whether the children or young person belonged to the intervention or control arm and any demographic variables that show imbalance between the two groups.

### 2.3.2. Tracer conditions: cost-effectiveness/utility and cost-benefit analyses

This within-trial economic evaluation will also compare CYPHP with EUC for patients under 16 with asthma, constipation, and/or eczema. Three types of economic evaluation will be conducted. The cost-effectiveness analysis, using point improvement in the PedsQL scale as the primary outcome, and the cost-utility analysis, based on quality-adjusted life years (QALYs) from the CHU-9D, will adopt an NHS and Personal Social Services (PSS) perspective. The cost-benefit analysis will take a societal perspective and additionally account for costs falling on parents, and schools, as well as valuing parental wellbeing with the Warwick-Edinburg Mental Wellbeing Scale (WEMWBS). These analyses will adhere to guidelines for conducting economic evaluations alongside clinical trials<sup>1</sup> and the most recent National Institute for Health and Care Excellence (NICE) public health reference case(24–27).

## Costing: Identification, measurement, and valuation of resources

Costing involves identifying, measuring, and valuing the resources used to deliver and participate in the intervention, and consequential health and social services use. In a complex system change such as CYPHP, the comprehensive identification of resources requires close collaboration with the implementation and the process evaluation teams.

### *Identification of resource use*

CYPHP health and social care costs borne by the NHS and PSS mainly include time spent by medical professionals and service managers delivering CYPHP services, along with consequential health and social services utilisation by patients (**Table 3**). From a societal perspective, time spent by school staff participating in CYPHP and time away from work or school by parents and CYP are also accounted for. Because both intervention and control practices include EUC, EUC's delivery costs will be disregarded. Service use and time away from school and work will be considered for both CYPHP and EUC.

### *Measurement of resource use*

Resources used to implement CYPHP will be gathered from seven data sources, including the study's accounting data, service caseloads, CYPHP nurse's personal caseload notes, study questionnaires, primary care data, secondary care data, and interviews with CYPHP nurses (**Table 3**). EMIS will provide location, type, number and length of visits part of in-reach clinics and specialist team services. CYPHP nurse's caseload notes will supply information on specialist team training and multidisciplinary team case-planning. Time spent at lunch-and-learn sessions will be obtained from service caseloads. Patient-level service use will be gathered from primary and secondary care activity files. Family and CYP time away from work or school are questions included in the study questionnaires. Interviews with a random sample of CYPHP nurses to understand their phone usage and transportation to patient visits will also be conducted.

### *Valuation of resource use*

As with the population-level cost analysis, national unit costs for children's services will be obtained from the Unit Costs of Health and Social Care 2019 (20) and NHS reference costs for 2015-16 (21). The Unit Costs of Health and Social Care 2014 version will also be used to value referrals to social care services (28). Unit costs not available from these sources will be collected from trial records directly (e.g. monthly rent of children's health center use). All unit costs will be presented in pounds sterling (£) for a base cost year 2020/2021; the Hospital and Community Health Services pay and price index will be used to adjust for inflation(28). As the horizon of the within-trial analysis is 6 and 12 months, no discounting will be applied to either costs or outcomes.

**Table 3. Identification and measurement of costs**

| Cost components                        | Description of resources used                                                                      | Unit of measure       | Source, level data collected                           |
|----------------------------------------|----------------------------------------------------------------------------------------------------|-----------------------|--------------------------------------------------------|
| <b>Intervention delivery costs</b>     |                                                                                                    |                       |                                                        |
| Set-up costs                           | Hiring costs, training, materials                                                                  | Total costs           | Study's accounting data                                |
| 1.In-reach clinics                     | Paediatrician, general practitioner, mental health specialist, etc.                                | Minutes               | Primary care data (EMIS), patient                      |
| 2.Specialist nurse-led services        | •CYPHP nurses, mental health specialists, etc.                                                     | Minutes               | Primary care data, patient                             |
|                                        | •Phone usage                                                                                       | Minutes/text messages | Interview CYPHP nurse, service                         |
|                                        | •Travel to patients (distance and mileage)                                                         | Minutes and £         | Primary care data and interview CYPHP nurse, service   |
| 3.Specialist team training             | •CYPHP nurses, primary care, secondary care staff, etc.                                            | Minutes               | Study's accounting data, service                       |
|                                        | •School staff                                                                                      | Rent                  | CYPHP nurse's caseload notes, service                  |
| 4.Population health management         | •Population health clinician, analyst, manager                                                     | Minutes               | Study's accounting data, service                       |
| 5.Multidisciplinary team case-planning | •CYPHP nurses, primary care, secondary care staff, etc.                                            | Minutes               | CYPHP nurse's caseload notes, service                  |
| Lunch-and-learn sessions               | Paediatrician, general practitioner, other child health professionals, clerks/administrative, etc. | Minutes               | Service Caseloads, service                             |
| Overhead costs                         | Using spaces, data access and storage                                                              | £                     | Study's accounting data                                |
| <b>Service use</b>                     |                                                                                                    |                       |                                                        |
|                                        | •General practitioner                                                                              | No. visits            | Primary care data and secondary care activity, patient |
|                                        | •Paediatrician                                                                                     | No. visits            |                                                        |
|                                        | •Hospital outpatient                                                                               | No. visits            |                                                        |
|                                        | •Hospital inpatient                                                                                | No. visits            |                                                        |
|                                        | •Accident and emergency                                                                            | No. visits            |                                                        |
|                                        | •Social care services†                                                                             | Referral yes/no       |                                                        |
| <b>CYP and family</b>                  |                                                                                                    |                       |                                                        |
|                                        | Time away from school                                                                              | Hours                 | Study questionnaires, patient                          |
|                                        | Time away from work                                                                                | Hours                 | Study questionnaires, parent                           |

Note: †CYPHP nurses may refer CYP and their families to social care services. An indicator for referrals to social services is available in primary care data. EMIS=Egton Medical information Systems. Secondary care data (inpatient stays, A&E attendances, and outpatient visits) will be obtained from Guy's and Sant Thomas' NHS Foundation Trust and King's College Hospital data.

#### **Computation of total costs**

*Total costs* will be computed at the patient level by summing *intervention delivery costs* (only CYP in intervention arm) and *health service use cost* (CYP in intervention and control arms)

- 1
- 2
- 3
- 4
- 5
- 6
- 7
- 8
- 9
- 10
- 11
- 12
- 13
- 14
- 15
- 16
- 17
- 18
- 19
- 20
- 21
- 22
- 23
- 24
- 25
- 26
- 27
- 28
- 29
- 30
- 31
- 32
- 33
- 34
- 35
- 36
- 37
- 38
- 39
- 40
- 41
- 42
- 43
- 44
- 45
- 46
- 47
- 48
- 49
- 50
- 51
- 52
- 53
- 54
- 55
- 56
- 57
- 58
- 59
- 60
- *Intervention delivery costs* will include set-up, CYPHP delivery and overhead costs. Some of these components will vary across patients (e.g., specialist team services), others across clinics (e.g., staff specialist training), and others will be the same for all patients (e.g., overhead costs such as the cost of administration and facilities). Staff specialist training costs, costs of universal services (in-reach clinics), intervention set-up costs, and overheads will each be apportioned. CYP with tracer conditions are the target population of the economic evaluation. The cost of universal services, however, also needs to be considered as CYP with tracer conditions may be referred to specialist team services during an in-reach clinic visit. Different apportioning rules will be used, for example, the costs of universal services could be apportioned by using the percentage of CYP with tracer conditions who were referred by in-reach clinics. Total per-patient apportioned costs will be added to patient-level specialist team services costs.
- *Health service use costs* will result from multiplying the quantity of services used, by their unit cost, and summing across services types for each patient.

Total costs of patients in the control arm will only reflect health service use costs.

In the cost-benefit analysis, total costs will also include costs borne by patients, parent and schools. Patient and parents' costs will be comprised of school and work time lost, respectively. Schools' costs will include time spent by school staff attending specialist team training.

### Measurement and valuation of health outcomes

The trial's primary health outcome measure of the tracer conditions evaluation is the Pediatric Quality of Life Inventory (PedsQL), which will be used in the cost-effectiveness analysis. The PedsQL includes 23 items covering physical, emotional, social and school functioning(29) and is available through 6 age-specific questionnaires (0-12 months, 13-24 months, 2-4 years, 5-7 years, 8-12 years, and 13-17 years). The PedsQL has shown to be reliable, valid and responsive to meaningful change across general and disease-specific populations(29–31). The Child Health Utility questionnaire (CHU-9D)—a generic preference-based measure of paediatric health-related quality of life that allows the calculation of quality adjusted life years (QALYs)—will be the health outcome measure for cost-utility analysis. The 9 items of CHU-9D cover feeling worried, sad, tired, annoyed, perceptions of schoolwork, sleep, daily routine, and social activities. The tool is designed to be administered to CYP between 7-17 years of age, and a proxy version to be completed by parents is available for younger children(32,33). The Warwick-Edinburg Mental Wellbeing Scale (WEMWBS) (34) will serve as a well-being questionnaire for parents. All questionnaires were administered at baseline and at two follow-up points (6 and 12 months). Questionnaires completed during the first phase of the Covid-19 pandemic [12 March 2020 – 6 July 2020], will be repeated after this period, and follow-up measures delayed. Multiple imputation will be used for questionnaires with missing values.

In the cost-benefit analysis, QALYs and WEMWBS will be combined by converting both to Pound Sterling values. QALYs will be monetised by using the government sector willingness-to-pay of £20,000 to £30,000 per QALY gained(35). For WEMWBS, the monetary values published by Simerica and HACT for each Short-version WEMWBS (SWEMWBS) score will be employed and converted to cost year 2020/2021 (36). The SWEMWBS score can be obtained from the original WEBWMS using seven of its 14 statements about thoughts and feelings.

## Statistical analyses

The intention-to-treat population will be used in statistical analyses. First, differences between protocolized and actual intervention components (including inputs, frequency and duration of each component) will be assessed (**Table 2**). Second, univariate analyses will be conducted to describe sample mean differences and variability across time between treatment and control group for each outcome. Three time points will contribute to analysis; baseline, 6-months, and 12 months. Third, to adjust for treatment group imbalances, multilevel regression models will be estimated for total costs, QALYs, PedsQL score, and benefits (£ corresponding to QALYs and WEBWMS scores together)(37). All these models will control for variables that, despite randomization, may still be unequally distributed between intervention and control groups such as age, gender and deprivation level for the patient-level models. For the regression model predicting QALYs, the baseline QALYs will also be controlled for(38). Benefits will be estimated using ordinary least squares, and costs with a GLM model with a gamma distribution and a log-link. Both the use of a GLM and limited dependent variable mixture models will be considered when modelling QALYs(39). All models will cluster standard errors to account for correlation of patients in the same CYPHP cluster.

For each outcome variable and intervention and control groups separately, mean predicted values will be generated. Three incremental cost-effectiveness ratios (difference between intervention and control in mean predicted costs over difference in mean predicted outcomes) will be computed, one for the cost-effectiveness analysis (based on PedsQL scores), another for the cost-utility analysis (using QALYs), and a third one for the cost-benefit analysis (£). These three ICERs will be generated based on 6 and 12-months data.

The pattern and amount of missing data between treatment and control groups by study variable will be assessed. If data is missing completely at random for both treatment and control groups and the percentage of missing data is below 5%, missing data will be ignored. If data is missing at random (MAR), multiple imputation accounting for clustering (such as fixed effects) will be used (40). When the data is MAR, multiple imputation can lead to consistent, asymptotically efficient, and asymptotically normal estimates(41).

## Handling uncertainty

The level of decision uncertainty arising from sampling and assumptions on key parameter estimates with policy impact will be assessed. Confidence intervals for ICERs based on the non-parametric bootstrap method will be generated(42), along with acceptability curves to reflect the probability of CYPHP being cost-effective as the willingness-to-pay per QALY (or other health outcome) increases. Deterministic sensitivity analyses on chosen variables (such as intervention set-up costs, intensity of services delivered, and social care costs) will assist in identifying key drivers of the results. Subgroup analysis of cost-effectiveness results by tracer condition and quintiles of IMD will be conducted as long as a sufficient sample size is available.

## 2.3. Long-term modelling of health and costs beyond the trial

A state-transition model reflecting natural disease progression will be developed for each tracer condition to predict the cost-effectiveness of CYPHP compared to EUC beyond the trial duration. Trial data will be used to define the health states, transition probabilities among states, and to calculate the costs and effects from an NHS/PSS perspective. Existing literature and publicly available statistics (e.g., Office of National Statistics and existing UK cohort studies) will also be used to gather transition probabilities across states beyond 12 months. A functional form characterizing the sustainability of intervention effects into the longer run (changes in health-related quality of life and

health services utilisation) will be inferred based on 6 months and 12 months trial data. The effect of alternative analytic horizons on the cost-effectiveness of CYPHP versus EUC will be tested in sensitivity analyses, including 2, 5, and 10 years.

## DISCUSSION

The CYPHP Evelina London model is a health-systems strengthening programme to advance towards integrated and high-quality care for children and young people in the UK. By offering universal and targeted services, CYPHP aims to overcome patient- and provider-level barriers to effective management of physical and mental health and foster optimal health behaviour. The aims of this economic evaluation are to establish the impact of CYPHP on healthcare costs at the population level and the cost-effectiveness of the intervention among CYP with tracer conditions. Asthma, constipation, and eczema serve as examples of common long-term conditions among CYP. Lessons from managing these conditions should inform a broader health system response to the epidemiological transition to chronic diseases.

### Strengths and weaknesses

Beyond temporary trial suspension, Covid-19 may have affected our study in at least two ways. First, CYPHP delivery may not return to normal after the pandemic. Differences in the frequency and duration of each CYPHP component before and after Covid-19 will be assessed in sensitivity analyses. Second, some follow-up questionnaires were due during Covid-19. When possible, data were collected, and an additional data point after Covid-19 was included for these participants to isolate changes in health status due to the pandemic.

By carrying out three economic evaluations (cost-effectiveness, cost-utility, and cost-benefit) under two different perspectives (NHS and PSS, and societal), we aim to inform stakeholders with various interests, including Clinical Commissioning Groups and evolving Integrated Care System, GP Federations, Provider Trusts, CYP and their families. With CYPHP, healthcare utilisation costs may remain stable if primary care visits increase, but hospitalisations and emergency room visits decrease. Parents and children's costs related to time lost from work or school are also expected to decline with CYPHP if CYP's tracer conditions are well managed. Our planned analyses will allow both to be studied and accounted for.

The long-term model will assess the cost-effectiveness of CYPHP compared to EUC beyond the trial duration to fully capture intervention effects on children with asthma, constipation and/or eczema. Existing cost-effectiveness studies assessing interventions for CYP with these tracer conditions rarely include a long-term model, and the duration of RCTs of education, coaching, nurse-led clinics or treatments for the tracer conditions tend to be under three years (43–48). CYPHP is expected to foster long-lasting improvements beyond 12 months in health outcomes due to changes in disease management behaviour among the CYP and family, and also health professionals. The natural progression of the tracer conditions indicates that a substantial percentage of children continue to experience symptoms beyond 12 months, and sometimes even into adulthood. Asthma in childhood persists into adulthood for 79% of the cases (49). About half of children with atopic eczema still have the problem as adults (50,51). Twenty five percent of children with functional constipation continue to experience symptoms as adults (52,53).

This study will contribute rigorous evidence about health economics of children's integrated healthcare in the UK, where there has been a notable paucity of high-quality evidence. Results from this study will directly inform decisions on children's healthcare provision in South East London and will provide rigorous evidence to inform policy nationally and internationally.

### Authors contributions

Marina Soley-Bori: Conceptualization, Methodology, Writing - Original Draft, Writing - Review & Editing, Investigation, Visualisation; Raghu lingam: Writing - Review & Editing, Funding acquisition; Rose-Marie Satherley: Writing - Review & Editing, Investigation. Julia Forman: Writing - Review & Editing. Lizzie Cecil: Writing - Review & Editing. Julia Fox-Rushby: Conceptualization, Methodology, Supervision, Writing - Review & Editing; Ingrid Wolfe: Writing - Review & Editing, Funding acquisition.

**Funding:** This work was supported by Guy's and St Thomas' Charity.

### Declaration of interests

The authors declare no conflict of interest

### References

1. Cheung R. International comparisons of health and wellbeing in early childhood. Lond Nuffield Trust. 2018;
2. OECD. Health Status : Maternal and infant mortality [Internet]. [cited 2020 Sep 17]. Available from: <https://stats.oecd.org/index.aspx?queryid=30116#>
3. Wolfe I, Thompson M, Gill P, Tamburlini G, Blair M, Bruel A van den, et al. Health services for children in western Europe. *The Lancet*. 2013 Apr 6;381(9873):1224–34.
4. Wolfe I, Macfarlane A, Donkin A, Marmot M, Viner R. Why children die: death in infants, children, and young people in the UK—Part A. *Lond R Coll Paediatr Child Health*. 2014;
5. Davies SC, Lemer C, Strelitz J, Weil L. Our children deserve better: prevention pays. *Lancet Lond Engl*. 2013 Oct 26;382(9902):1383–4.
6. Hoey H, Aanstoot H-J, Chiarelli F, Daneman D, Danne T, Dorchy H, et al. Good Metabolic Control Is Associated With Better Quality of Life in 2,101 Adolescents With Type 1 Diabetes. *Diabetes Care*. 2001 Nov 1;24(11):1923–8.
7. Sundbom F, Malinowski A, Lindberg E, Alving K, Janson C. Effects of poor asthma control, insomnia, anxiety and depression on quality of life in young asthmatics. *J Asthma*. 2016 Apr 20;53(4):398–403.
8. Boyd M, Lasserson TJ, McKean MC, Gibson PG, Ducharme FM, Haby M. Interventions for educating children who are at risk of asthma-related emergency department attendance. *Cochrane Database Syst Rev*. 2009 Apr 15;(2):CD001290.
9. Ordoñez GA, Phelan PD, Olinsky A, Robertson CF. Preventable factors in hospital admissions for asthma. *Arch Dis Child*. 1998 Feb 1;78(2):143–7.
10. Castro M, Zimmermann NA, Crocker S, Bradley J, Leven C, Schechtman KB. Asthma intervention program prevents readmissions in high healthcare users. *Am J Respir Crit Care Med*. 2003;168(9):1095–9.

11. Nunes C, Ladeira S. Asthma, from childhood to adulthood: a prospective 20-year longitudinal study of a cohort of asthmatics. *J Investig Allergol Clin Immunol*. 2002;12(4):242–9.
12. Stevens CA, Turner D, Kuehni CE, Couriel JM, Silverman M. The economic impact of preschool asthma and wheeze. *Eur Respir J*. 2003 Jun 1;21(6):1000–6.
13. UNICEF. Convention on the Rights of the Child [Internet]. [cited 2020 Oct 3]. Available from: <https://www.unicef.org/child-rights-convention>
14. Belli PC, Bustreo F, Preker A. Investing in children’s health: what are the economic benefits? *Bull World Health Organ*. 2005;83:777–84.
15. Guyer B, Ma S, Grason H, Frick K, Perry D, Wigton A, et al. INVESTMENTS TO PROMOTE CHILDREN ‘S HEALTH: A systematic literature review and economic analysis of interventions in the preschool period. *Baltim MD Johns Hopkins Bloom Sch Public Health*. 2008;
16. Wolfe I, Satherley R-M, Scotney E, Newham J, Lingam R. Integrated Care Models and Child Health: A Meta-analysis. *Pediatrics* [Internet]. 2020 Jan 1 [cited 2020 Apr 16];145(1). Available from: <https://pediatrics.aappublications.org/content/145/1/e20183747>
17. 2019 child health profiles [Internet]. GOV.UK. [cited 2020 Feb 13]. Available from: <https://www.gov.uk/government/statistics/2019-child-health-profiles>
18. Newham JJ, Forman J, Heys M, Cousens S, Lemer C, Elsherbiny M, et al. Children and Young People’s Health Partnership (CYPHP) Evelina London model of care: protocol for an opportunistic cluster randomised controlled trial (cRCT) to assess child health outcomes, healthcare quality and health service use. *BMJ Open* [Internet]. 2019 Aug 1 [cited 2020 Feb 13];9(8). Available from: <https://bmjopen.bmj.com/content/9/8/e027301>
19. Satherley R-M, Green J, Sevdalis N, Newham JJ, Elsherbiny M, Forman J, et al. The Children and Young People’s Health Partnership Evelina London Model of Care: process evaluation protocol. *BMJ Open* [Internet]. 2019 Sep 3 [cited 2020 Feb 13];9(8). Available from: <https://www.ncbi.nlm.nih.gov/pmc/articles/PMC6731816/>
20. PSSRU. Unit Costs of Health and Social Care 2019 [Internet]. 2019. Available from: <https://www.pssru.ac.uk/project-pages/unit-costs/unit-costs-2019/>
21. NHS reference costs 2015 to 2016 [Internet]. GOV.UK. [cited 2020 May 21]. Available from: <https://www.gov.uk/government/publications/nhs-reference-costs-2015-to-2016>
22. Franklin M, Lomas J, Walker S, Young T. An Educational Review About Using Cost Data for the Purpose of Cost-Effectiveness Analysis. *PharmacoEconomics*. 2019 May 1;37(5):631–43.
23. Mantopoulos T, Mitchell PM, Welton NJ, McManus R, Andronis L. Choice of statistical model for cost-effectiveness analysis and covariate adjustment: empirical application of prominent models and assessment of their results. *Eur J Health Econ HEPAC Health Econ Prev Care*. 2016 Nov;17(8):927–38.
24. NICE. Methods for the development of NICE public health guidance (third edition). 2013.
25. Glick HA, Doshi JA, Sonnad SS, Polsky D. Economic evaluation in clinical trials. OUP Oxford; 2014.



- 1
  - 2
  - 3
  - 4
  - 5
  - 6
  - 7
  - 8
  - 9
  - 10
  - 11
  - 12
  - 13
  - 14
  - 15
  - 16
  - 17
  - 18
  - 19
  - 20
  - 21
  - 22
  - 23
  - 24
  - 25
  - 26
  - 27
  - 28
  - 29
  - 30
  - 31
  - 32
  - 33
  - 34
  - 35
  - 36
  - 37
  - 38
  - 39
  - 40
  - 41
  - 42
  - 43
  - 44
  - 45
  - 46
  - 47
  - 48
  - 49
  - 50
  - 51
  - 52
  - 53
  - 54
  - 55
  - 56
  - 57
  - 58
  - 59
  - 60
26. Fox-Rushby J, Cairns J. Economic evaluation. McGraw-Hill Education (UK); 2005.
27. Ramsey SD, Willke RJ, Glick H, Reed SD, Augustovski F, Jonsson B, et al. Cost-effectiveness analysis alongside clinical trials II-An ISPOR Good Research Practices Task Force report. *Value Health J Int Soc Pharmacoeconomics Outcomes Res.* 2015 Mar;18(2):161–72.
28. Curtis, L. Unit Costs of Health and Social Care 2014. University of Kent: Personal Social Services Research Unit;
29. Varni J, Seid M, Rode C. The PedsQL™: Measurement Model for the Pediatric Quality of Life Inventory. *Med Care.* 1999 Feb;37(2):126–39.
30. Chan KS, Mangione-Smith R, Burwinkle TM, Rosen M, Varni JW. The PedsQL: reliability and validity of the short-form generic core scales and Asthma Module. *Med Care.* 2005 Mar;43(3):256–65.
31. Seid M, Limbers CA, Driscoll KA, Opiari-Arrigan LA, Gelhard LR, Varni JW. Reliability, validity, and responsiveness of the pediatric quality of life inventory (PedsQL) generic core scales and asthma symptoms scale in vulnerable children with asthma. *J Asthma Off J Assoc Care Asthma.* 2010 Mar;47(2):170–7.
32. Stevens K. Developing a descriptive system for a new preference-based measure of health-related quality of life for children. *Qual Life Res Int J Qual Life Asp Treat Care Rehabil.* 2009 Oct;18(8):1105–13.
33. Stevens K. Assessing the performance of a new generic measure of health-related quality of life for children and refining it for use in health state valuation. *Appl Health Econ Health Policy.* 2011 May 1;9(3):157–69.
34. Tennant R, Hiller L, Fishwick R, Platt S, Joseph S, Weich S, et al. The Warwick-Edinburgh Mental Well-being Scale (WEMWBS): development and UK validation. *Health Qual Life Outcomes.* 2007 Nov 27;5(1):63.
35. NICE. 6 Incorporating health economics | Methods for the development of NICE public health guidance (third edition) | Guidance | NICE [Internet]. NICE; [cited 2020 Mar 2]. Available from: <https://www.nice.org.uk/process/pmg4/chapter/incorporating-health-economics>
36. Trotter, L., Rallings Adams, M-K. Valuing improvements in mental health: Applying the wellbeing valuation method to WEMWBS. HACT; 2017.
37. Gomes M, Grieve R, Nixon R, Ng ES-W, Carpenter J, Thompson SG. Methods for Covariate Adjustment in Cost-Effectiveness Analysis That Use Cluster Randomised Trials. *Health Econ.* 2012;21(9):1101–18.
38. Manca A, Hawkins N, Sculpher MJ. Estimating mean QALYs in trial-based cost-effectiveness analysis: the importance of controlling for baseline utility. *Health Econ.* 2005 May;14(5):487–96.
39. Hernández Alava M, Wailoo AJ, Ara R. Tails from the Peak District: Adjusted Limited Dependent Variable Mixture Models of EQ-5D Questionnaire Health State Utility Values. *Value Health.* 2012 May 1;15(3):550–61.

- 1
  - 2
  - 3
  - 4
  - 5
  - 6
  - 7
  - 8
  - 9
  - 10
  - 11
  - 12
  - 13
  - 14
  - 15
  - 16
  - 17
  - 18
  - 19
  - 20
  - 21
  - 22
  - 23
  - 24
  - 25
  - 26
  - 27
  - 28
  - 29
  - 30
  - 31
  - 32
  - 33
  - 34
  - 35
  - 36
  - 37
  - 38
  - 39
  - 40
  - 41
  - 42
  - 43
  - 44
  - 45
  - 46
  - 47
  - 48
  - 49
  - 50
  - 51
  - 52
  - 53
  - 54
  - 55
  - 56
  - 57
  - 58
  - 59
  - 60
40. DiazOrdaz K, Kenward MG, Gomes M, Grieve R. Multiple imputation methods for bivariate outcomes in cluster randomised trials. *Stat Med*. 2016 10;35(20):3482–96.
41. Paul D. Allison. Missing Data [Internet]. SAGE Publications Inc. 2020 [cited 2020 Feb 29]. Available from: <https://us.sagepub.com/en-us/nam/missing-data/book9419>
42. Chaudhary MA, Stearns SC. Estimating confidence intervals for cost-effectiveness ratios: an example from a randomized trial. *Stat Med*. 1996 Jul 15;15(13):1447–58.
43. Sullivan SD, Weiss KB, Lynn H, Mitchell H, Kattan M, Gergen PJ, et al. The cost-effectiveness of an inner-city asthma intervention for children. *J Allergy Clin Immunol*. 2002 Oct 1;110(4):576–81.
44. Madge P, McColl J, Paton J. Impact of a nurse-led home management training programme in children admitted to hospital with acute asthma: a randomised controlled study. *Thorax*. 1997 Mar 1;52(3):223–8.
45. Noyes K, Bajorska A, Fisher S, Sauer J, Fagnano M, Halterman JS. Cost-effectiveness of the School-Based Asthma Therapy (SBAT) program. *Pediatrics*. 2013 Mar;131(3):e709-717.
46. Franco R, Santos AC, do Nascimento HF, Souza-Machado C, Ponte E, Souza-Machado A, et al. Cost-effectiveness analysis of a state funded programme for control of severe asthma. *BMC Public Health*. 2007 May 17;7(1):82.
47. Schuttelaar MLA, Vermeulen KM, Coenraads PJ. Costs and cost-effectiveness analysis of treatment in children with eczema by nurse practitioner vs. dermatologist: results of a randomized, controlled trial and a review of international costs. *Br J Dermatol*. 2011;165(3):600–11.
48. Ismail N, Ratchford I, Proudfoot C, Gibbs J. Impact of a nurse-led clinic for chronic constipation in children. *J Child Health Care*. 2011 Sep 1;15(3):221–9.
49. Andersson M, Hedman L, Bjerg A, Forsberg B, Lundbäck B, Rönmark E. Remission and persistence of asthma followed from 7 to 19 years of age. *Pediatrics*. 2013 Aug;132(2):e435-442.
50. Abuabara K, Hoffstad O, Troxel A, Gelfand JM, Margolis DJ. Atopic dermatitis disease control and age: A cohort study. *J Allergy Clin Immunol*. 2015 Jul;136(1):190-192.e3.
51. Ridd MJ, King AJL, Le Roux E, Waldecker A, Huntley AL. Systematic review of self-management interventions for people with eczema. *Br J Dermatol*. 2017 Sep;177(3):719–34.
52. Auth MKH, Vora R, Farrelly P, Baillie C. Childhood constipation. *BMJ [Internet]*. 2012 Nov 13 [cited 2020 Jun 19];345. Available from: <https://www.bmj.com/content/345/bmj.e7309>
53. Bongers MEJ, Wijk MP van, Reitsma JB, Benninga MA. Long-Term Prognosis for Childhood Constipation: Clinical Outcomes in Adulthood. *Pediatrics*. 2010 Jul 1;126(1):e156–62.

# BMJ Open

## The Children and Young People's Health Partnership Evelina London Model of Care: economic evaluation protocol of a complex system change

|                                 |                                                                                                                                                                                                                                                                                                                                                                                                                                                                                                                 |
|---------------------------------|-----------------------------------------------------------------------------------------------------------------------------------------------------------------------------------------------------------------------------------------------------------------------------------------------------------------------------------------------------------------------------------------------------------------------------------------------------------------------------------------------------------------|
| Journal:                        | <i>BMJ Open</i>                                                                                                                                                                                                                                                                                                                                                                                                                                                                                                 |
| Manuscript ID                   | bmjopen-2020-047085.R1                                                                                                                                                                                                                                                                                                                                                                                                                                                                                          |
| Article Type:                   | Protocol                                                                                                                                                                                                                                                                                                                                                                                                                                                                                                        |
| Date Submitted by the Author:   | 12-Jun-2021                                                                                                                                                                                                                                                                                                                                                                                                                                                                                                     |
| Complete List of Authors:       | Soley-Bori, Marina; King's College London, Lingam, Raghu; University of New South Wales, School of Women's and Children's Health<br>Satherley, Rose-Marie; King's College London, Forman, Julia; Kings College London , Department of Women's and Children's Health<br>Cecil, E; King's College London, Department of Women's and Children's Health<br>Fox-Rushby, Julia; Kings College London, Population Health Sciences<br>Wolfe, Ingrid; King's College London, Department of Women's and Children's Health |
| <b>Primary Subject Heading</b>: | Paediatrics                                                                                                                                                                                                                                                                                                                                                                                                                                                                                                     |
| Secondary Subject Heading:      | Health economics, Health policy                                                                                                                                                                                                                                                                                                                                                                                                                                                                                 |
| Keywords:                       | HEALTH ECONOMICS, PAEDIATRICS, Health policy < HEALTH SERVICES ADMINISTRATION & MANAGEMENT                                                                                                                                                                                                                                                                                                                                                                                                                      |
|                                 |                                                                                                                                                                                                                                                                                                                                                                                                                                                                                                                 |

SCHOLARONE™  
Manuscripts

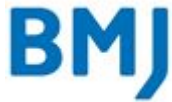

I, the Submitting Author has the right to grant and does grant on behalf of all authors of the Work (as defined in the below author licence), an exclusive licence and/or a non-exclusive licence for contributions from authors who are: i) UK Crown employees; ii) where BMJ has agreed a CC-BY licence shall apply, and/or iii) in accordance with the terms applicable for US Federal Government officers or employees acting as part of their official duties; on a worldwide, perpetual, irrevocable, royalty-free basis to BMJ Publishing Group Ltd ("BMJ") its licensees and where the relevant Journal is co-owned by BMJ to the co-owners of the Journal, to publish the Work in this journal and any other BMJ products and to exploit all rights, as set out in our [licence](#).

The Submitting Author accepts and understands that any supply made under these terms is made by BMJ to the Submitting Author unless you are acting as an employee on behalf of your employer or a postgraduate student of an affiliated institution which is paying any applicable article publishing charge ("APC") for Open Access articles. Where the Submitting Author wishes to make the Work available on an Open Access basis (and intends to pay the relevant APC), the terms of reuse of such Open Access shall be governed by a Creative Commons licence – details of these licences and which [Creative Commons](#) licence will apply to this Work are set out in our licence referred to above.

Other than as permitted in any relevant BMJ Author's Self Archiving Policies, I confirm this Work has not been accepted for publication elsewhere, is not being considered for publication elsewhere and does not duplicate material already published. I confirm all authors consent to publication of this Work and authorise the granting of this licence.

1  
2  
3 1 **The Children and Young People's Health Partnership Evelina London Model of Care: economic**  
4 2 **evaluation protocol of a complex system change**  
5  
6 3  
7

8 4 **Authors**

9  
10 5 Marina Soley-Bori<sup>1,6</sup>, Raghu Lingam<sup>2</sup>, Rose-Marie Satherley<sup>3</sup>, Julia Forman<sup>4,6</sup>, Lizzie Cecil<sup>4,6</sup>, and Julia  
11 6 Fox-Rushby<sup>1,5\*</sup> & Ingrid Wolfe<sup>4,6\*</sup>  
12

13 7 <sup>1</sup> School of Population Health & Environmental Sciences, Kings College London, London, UK.

14 8 <sup>2</sup> School of Women's and Children's Health, University of New South Wales, Sydney, Australia.

15 9 <sup>3</sup> Department of Psychological Interventions, University of Surrey, Guilford, UK.

16 10 <sup>4</sup> Department of Women's and Children's Health, School of Life Course Sciences, Kings College  
17 11 London, London, UK.

18 12 <sup>5</sup> NIHR Biomedical Research Centre, Guy's and St Thomas' NHS Foundation Trust and King's College  
19 13 London, London UK

20 14 <sup>6</sup> Institute for Women and Children's Health, King's Health Partners, London, UK  
21 15

22 16 \*Joint last authors  
23 17

24 18 Corresponding author

25 19 Dr Marina Soley-Bori  
26 20 King's College London  
27 21 Faculty of Life Sciences and Medicine  
28 22 School of Population Health & Environmental Sciences  
29 23 Guy's Campus, Great Maze Pond, London SE1 1UL  
30 24 [Marina.soley\\_bori@kcl.ac.uk](mailto:Marina.soley_bori@kcl.ac.uk)  
31 25

32 26 **Abstract**

33 27 **Introduction:** The Children and Young People's Health Partnership (CYPHP) Evelina London Model of  
34 28 Care is a new approach to integrated care delivery for children and young people with common  
35 29 health complaints and chronic conditions. CYPHP includes population health management (services  
36 30 shaped by data-driven understanding of population and individual needs, applied in this case to  
37 31 enable proactive case-finding and tailored biopsychosocial care), specialist clinics with  
38 32 multidisciplinary health teams, and training resources for professionals working with children and  
39 33 young people. This complex health system strengthening program has been implemented in South  
40 34 London since April 2018, and will be evaluated using a cluster randomised control trial (cRCT) with  
41 35 an embedded process evaluation. This protocol describes the within- and beyond-trial economic  
42 36 evaluation of CYPHP.  
43 37

44 38 **Methods and analysis:** The economic evaluation will identify, measure, and value resources and  
45 39 health outcome impacts of CYPHP compared with Enhanced Usual Care (EUC) from a National Health  
46 40  
47 41  
48 42  
49 43  
50 44  
51 45  
52 46  
53 47  
54 48  
55 49  
56 50  
57 51  
58 52  
59 53  
60 54

1  
2  
3 39 Service/ Personal Social Service and a broader societal perspective. The study population includes  
4 40 90,000 children and young people under 16 years of age in 23 clusters (groups of GP practices) to  
5 41 assess health service use and costs, with more detailed cost-effectiveness analysis of a targeted  
6 42 sample of 2,138 children and young people with asthma, eczema, or constipation (tracer conditions).  
7 43 For the cost-effectiveness analysis, health outcomes will be measured using the Pediatric Quality of  
8 44 Life Inventory (PedsQL) and quality-adjusted life years (QALYs) using the Child Health Utility measure  
9 45 (CHU-9D). To account for changes in parental wellbeing, the Warwick-Edinburg Mental Wellbeing  
10 46 Scale (WEMWBS) will be integrated with QALYs in a cost-benefit analysis. The within-trial economic  
11 47 evaluation will be complemented by a novel long-term model that expands the analytic horizon to  
12 48 10 years. Analyses will adhere to good practice guidelines and National Institute for Health and Care  
13 49 Excellence (NICE) public health reference case.

17 50 **Ethics and dissemination:** The study has received ethical approval from South West-Cornwall &  
18 51 Plymouth Research Ethics Committee (REC Reference: 17/SW/0275. Results will be submitted for  
19 52 publication in peer-reviewed journals, made available in briefing papers for local decision-makers,  
20 53 and provided to the local community through website and public events. Findings will be  
21 54 generalisable to community-based models of care, especially in urban settings.

24 55 **Trial registration number:** NCT03461848; Pre-results.

27 57 **Strength and limitations of this study:**

- 29 58
- 30 59 • Robust study design: CYPHP will be evaluated using a cluster randomised control trial (cRCT)  
31 60 with an embedded process evaluation.
  - 32 61 • Multiple analytic perspectives: Both the NHS and Personal Social Services (PSS) perspective  
33 62 and a societal perspective, accounting for costs falling on parents and schools, will be  
34 63 adopted.
  - 35 64 • Long analytic horizon: The within-trial economic evaluation will be complemented by a novel  
36 65 long-term model that expands the analytic horizon to 10 years
  - 37 66 • Impact of Covid-19 on CYPHP service delivery: Differences in the frequency and duration of  
38 67 each CYPHP component before and after Covid-19 may be observed, which will be assessed  
39 68 in sensitivity analyses.
  - 40 69 • Measurement of intervention effects: The intensity of the different intervention  
41 70 components may have varied across GP practices and the measurement of health effects  
42 71 with the CHU-9D for children below 5 may lack reliability.
  - 43 72
  - 44 73
  - 45 74
  - 46 75

51 76 **Key words:** Integrated care, cost-effectiveness, decision modelling, paediatrics

52 77

53 78

54 79

55 80

56 81

57 82

58 83

59 84

60 85

## 1. INTRODUCTION

In 2018 nearly 1400 excess child deaths occurred in the UK compared with Sweden, adjusting for population size (1,2). The UK fares worse than other high-income countries in chronic disease management too. Only 16% of young people in the UK with type 1 diabetes had a glycated haemoglobin A1c under 7.5%, whereas in Germany and Austria this standard was met for 34% of young people (3–5). Poor chronic disease management results in worse health-related quality of life (6,7), and in higher emergency room visits and hospitalisations, which are key healthcare cost drivers (5,8–11). Beyond direct medical costs, poorly controlled chronic conditions result in time lost from school and employment, placing a significant burden on families. For example, the overall cost of caring for children with asthma aged 1–5 years in the 12 months following attendance at hospital for wheeze or asthma is estimated to be 14.53 million GBP (12).

Ensuring good health in childhood is a public health priority both as a rights-based principle (13), and for the health, social, and economic consequences in adulthood (14,15). Notwithstanding the current pandemic, the UK paediatric healthcare delivery model—originally designed to treat acute conditions through high-intensity specialist and inpatient services—now needs to address chronic health care needs and emphasise preventive care. Previous efforts to integrate care for children and young people (CYP) with ongoing conditions have shown potential for improving quality of life and reducing costs, but evidence is limited (16).

The Children and Young People’s Health Partnership (CYPHP) Evelina London Model of Care is an innovative approach to integrated healthcare delivery. It was implemented in April 2018 in two London boroughs (Lambeth and Southwark) where A&E attendance for 0-4 year olds and hospital admissions related to asthma were 16% and 25% higher than the national average, respectively. (17). The CYPHP model aims to strengthen the health system by bridging the gap between primary and secondary care, physical and mental health, and links healthcare with local efforts to tackle the socioeconomic determinants of health. Through coordinated, early intervention, and biopsychosocial care delivered in primary care and community settings, CYPHP has been developed to promote better healthcare and self-management for CYP with common health complaints and chronic conditions(18,19). The concept of biopsychosocial care follows many of the tenets of patient centred care as outlined by Tramonti and colleagues (20), however we use a more specific term to describe the model in greater detail.

CYPHP will be implemented across Southwark and Lambeth in two stages. The staged implementation offers a platform for an opportunistic clustered Randomised Control Trial (cRCT) study design for rigorous evaluation purposes, running alongside a service evaluation reporting regularly to a Partnership Board of commissioner, provider, community organisations, and researchers. In the first CYPHP deployment stage (approximately 3 years), general practices were randomised to either CYPHP (intervention) or Enhanced Usual Care (EUC—control). After three years, CYPHP will be implemented in all of the practices.

The aims of the embedded economic evaluation are, first, to assess the impact of CYPHP compared to EUC on patient-level health care costs from an NHS and Personal Social Service (PSS) perspective for the entire trial population. Second, among children with specific targeted tracer conditions, to compare costs and health outcomes and establish the cost-effectiveness (cost per point improvement in the PedsQL) and cost-utility (cost per QALY) of CYPHP versus EUC also from an NHS and PSS perspective (NICE reference case(21)). Third, to capture the impact of this complex system change across government sectors, parents, and CYP, a cost-benefit analysis (cost per monetarized unit of WEMWBS and QALYs) of CYPHP compared to EUC from a societal perspective will also be

124 conducted. The cost-effectiveness of CYPHP compared to EUC beyond the trial duration will be  
 125 explored with a state-transition model reflecting natural disease progression for each tracer  
 126 condition. Existing evaluations of interventions to improve outcomes for children with tracer  
 127 conditions (such as education initiatives) rarely consider effects beyond 3 years, which may result in  
 128 a partial characterization of the intervention effects, and as such this method is a novel application  
 129 in child health economic research. Both the economic evaluation and the state-transition model are  
 130 essential as they will determine whether potential health gains related to the intervention justify its  
 131 costs relative to current practice, and therefore whether a decision to provide and roll-out the  
 132 intervention is justifiable in terms of efficiency.

133 Both the population and tracer-conditions analyses aim to inform decisions on the current CYPHP  
 134 provision in Lambeth and Southwark and throughout the South East London Integrated Care System,  
 135 as well as its potential expansion to other areas if proven efficient.

## 136 2. METHODS AND ANALYSIS

### 137 2.1. Study design

138 The study design and intervention components are outlined in detailed in our published trial  
 139 protocol paper (18). In summary, seventy general practices in Southwark and Lambeth were grouped  
 140 into 23 virtual clusters, occurring naturally for GP-pediatrician co-located clinics. Twelve of these  
 141 clusters were assigned to the intervention (CYPHP) and 11 clusters to the control group (EUC). For  
 142 randomization, clusters were stratified by borough, and restricted randomization was carried out to  
 143 ensure the number of CYP under 16 years, their socioeconomic status (measured by the Index of  
 144 Multiple Deprivation and Income Deprivation Affecting Children Index), and number of outpatient  
 145 referrals were similar between the two study arms. The trial population includes CYP under 16 years  
 146 of age registered to a general practice in Southwark or Lambeth. Key information on the CYPHP  
 147 intervention and evaluation are summarized in **Table 1**.

148 **Table 1. Key features of the CYPHP intervention and evaluation**

|                                                           |                                                                                                                                                                                                                                                                                                                                                                                     |
|-----------------------------------------------------------|-------------------------------------------------------------------------------------------------------------------------------------------------------------------------------------------------------------------------------------------------------------------------------------------------------------------------------------------------------------------------------------|
| 149 Targeted recruitment sample without loss to follow-up | 1,496                                                                                                                                                                                                                                                                                                                                                                               |
| 150 Route to change                                       | <ul style="list-style-type: none"> <li>• A theoretically informed intervention (Theoretical Domains Framework)</li> <li>• Evidence based (based on systematic review on integrated care models for child health(16))</li> <li>• Integrates care in line with patient, provider, and policy perspectives – providing efficient, preventive access to care, closer to home</li> </ul> |
| 151 Main strengths                                        | <ul style="list-style-type: none"> <li>• Opportunistic randomised controlled trial</li> <li>• Rich data with both patient-reported and routine service use data</li> <li>• Embedded process evaluation to assess CYPHP implementation success</li> </ul>                                                                                                                            |
| 152 Stakeholder involvement                               | CYPHP was developed with children and young people, carers, frontline practitioners, and health service commissioners                                                                                                                                                                                                                                                               |

153

### 154 2.2. Intervention and control arms

155

156

157

158

159

160



1  
2  
3 151 The study structure and components of CYPHP and EUC are described in **Figure 1**. As the  
4 152 intervention arm provides CYPHP on top of EUC, EUC is delivered at all practices. CYPHP offers  
5 153 universal services (available to all CYP, with any childhood condition) and targeted services (available  
6 154 only to CYP with tracer conditions - **asthma, constipation, and/or eczema**). EUC is comprised of  
7 155 several patient self-management support tools for families and resources available to health  
8 156 providers to provide higher quality and more joined-up care for CYP.

9  
10  
11 157 Specifically, CYPHP includes:

12  
13 158 

- CYPHP *universal services*

- 14 159
  1. *In-reach clinics*, integrated child health clinics co-delivered by patch-pediatricians  
15 160 and GPs (patch paediatricians are linked to a cluster of general practices) as part of  
16 161 a multidisciplinary CYP health team located in the community.
  - 17 162 2. *Lunch-and-learn sessions*, where a multidisciplinary group of CYP health  
18 163 professionals, including pediatricians and primary care staff share knowledge,  
19 164 review cases, create common professional cultures, build and reinforce team  
20 165 working practices.

21  
22  
23 166 

- CYPHP *targeted services (tracer conditions only)*

- 24 167
  - 25 168 3. *Specialist nurse-led services*, usually delivered by a CYPHP nurse trained in  
26 169 biopsychosocial care (mental health and other specialists are available too if  
27 170 needed) at the CYP's home, during a visit at a community-based clinic, or through a  
28 171 phone call or message. It includes health promotion and self-management advice  
29 172 on tracer conditions. Patients are triaged and care is planned based on a pre-  
30 173 assessment biopsychosocial Health Check (CYPHP Health Check) and patient  
31 174 records. The CYPHP Health Check is administered to patients with asthma,  
32 175 constipation, or eczema. It uses validated questionnaires when possible to measure  
33 176 biopsychosocial health. Child's ongoing conditions are assessed with the Patient  
34 177 Oriented Eczema Measure (POEM)(22) for children with eczema, the Asthma  
35 178 Control Test (ACT)(23) for asthma, and a bespoke CYPHP constipation  
36 179 questionnaire (validation work underway). The Strengths and Difficulties  
37 180 Questionnaire (SDQ)(24) is used as an emotional and behavioural screening  
38 181 questionnaire. Finally, a set of bespoke social questions to understand a family's  
39 182 broader situation and factors that may affect their health and care, such as financial  
40 183 worries and days lost of school or work, are also included. Participants who consent  
41 184 as research subjects, do also complete the Paediatric Quality of Life Inventory  
42 185 (PedsQL)(25) and the Child Health Utility 9-D (CHU-9D)(26).

- 43 186
  - 44 187 4. *Population health management*, where CYP with tracer conditions are sent text  
45 188 messages and a letter from their GP, encouraging them to participate in early  
46 189 intervention and care. Recipients are identified based on analyses of electronic health  
47 190 records and actively reached out to connect them with the healthcare system and  
48 191 improve the management of their conditions before they exacerbate.

- 49 192
  - 50 193 5. *Specialist team training*, including education and training for primary care, secondary  
51 194 care, or school staff on evidence-based, holistic, and CYP-friendly care for tracer  
52 195 conditions, is delivered by CYPHP professionals.

53 193 *Multidisciplinary team case-planning* is important for CYPHP delivery, present in both universal and  
54 194 targeted services. It includes case planning and both formal and informal education and training for  
55 195 professionals providing CYPHP.

196 **Table 2** describes the expected inputs, frequency, and duration of each CYPHP component. All these  
 197 data elements will be collected, as actual implementation may differ from protocolised  
 198 implementation.

199 **Table 2. Protocolised inputs, frequency, and duration of CYPHP components**

| Intervention component                         | Inputs                                                                                        | Frequency    | Duration                                           | Comments                                                                              |
|------------------------------------------------|-----------------------------------------------------------------------------------------------|--------------|----------------------------------------------------|---------------------------------------------------------------------------------------|
| <b>1. In-reach clinics</b>                     | Labour: GP and patch-paediatrician                                                            | Once a month | 20-30 min per patient                              | 2-3 hours total                                                                       |
| <b>2. Lunch-and-learn sessions</b>             | Labour: CYPHP nurse, mental health specialist, paediatrician and GP who works alongside CYPHP | Once a week  | 60 min                                             |                                                                                       |
| <b>3. Specialist nurse-led service</b>         | Labour: CYPHP nurse and mental health specialist<br>Capital: children's centre                | Varies       | 60 min (home), 30 min (general practice or school) | Service type, duration, and location tailored to CYP                                  |
| <b>4. Population health management</b>         | Labour: population health clinician, analyst, manager                                         | Varies       | Varies                                             | Data: access, storage, analysis<br>Proactive case finding: costs for sending messages |
| <b>5. Specialist team training</b>             | Labour: CYPHP nurse, primary care and secondary care staff, school staff                      | Varies       | Varies                                             | .                                                                                     |
| <b>6. Multidisciplinary team case planning</b> | Labour: CYPHP nurse, mental health specialist, paediatrician and GP who works alongside CYPHP | Once a week  | 60 min                                             | .                                                                                     |

200

201 CYP access CYPHP universal services via paediatrician or GP referrals. For specialist services, entry  
 202 sources include direct referrals (from GP, paediatrician, school nurse, or emergency department),  
 203 self-referrals (availability publicized through community events, posters in GP practices), and  
 204 proactive case finding (CYP with tracer conditions are sent text messages and a letter from their GP).  
 205 Further details on CYPHP's implementation are included in the publicly available handbook(27).

### 206 **2.3. Patient and Public Involvement**

207 Stakeholders were involved in the development of the theoretical framework for CYPHP,  
 208 identification of research questions and refining the research methodology. Stakeholders included  
 209 children and young people, carers, frontline practitioners, and health service commissioners. A  
 210 patient and public involvement group was developed with children and their families and it was  
 211 consulted with regard to evaluation design; including appropriateness of outcome measures and  
 212 consent procedures.

213

### 214 **2.4. Economic evaluation within the trial**

#### 215 **2.4.1. Population-level cost analysis**

1  
2  
3 216 The goal of the population-level analysis is to assess the impact of CYPHP compared to EUC on  
4 217 healthcare costs of health service use. This analysis will use the whole study population, which  
5 218 includes children and young people, 0-15 years of age, registered with a Southwark or Lambeth GP  
6 219 practice. Health service use will include primary care consultations, visits with pediatricians, hospital  
7 220 outpatient, hospital inpatient, and accident and emergency care during 6 and 12 months. Patient-  
8 221 level costs will be obtained by multiplying unit costs by utilisation. National unit costs for children's  
9 222 services will be obtained from the Unit Costs of Health and Social Care 2019 by the Personal Social  
10 223 Services Resource Unit (28) and the NHS reference costs for 2015-16 (29). Due to the often-skewed  
11 224 cost distribution with a large number of zeros and a long right-hand tail, the modified Park Test and  
12 225 Pregibon Link test will assess the most appropriate distribution and link to calibrate a Generalized  
13 226 linear model (GLM) for costs, for example, with a gamma distribution and a log-link (30,31). The cost  
14 227 model will adjust for a binary variable indicating whether the children or young person belonged to  
15 228 the intervention or control arm and any demographic variables that show imbalance between the  
16 229 two groups.

#### 20 230 **2.4.2. Tracer conditions: cost-effectiveness/utility and cost-benefit analyses**

21 231 This within-trial economic evaluation will also compare CYPHP with EUC for patients under 16 with  
22 232 asthma, constipation, and/or eczema. Three types of economic evaluation will be conducted. The  
23 233 cost-effectiveness analysis, using point improvement in the PedsQL scale as the primary outcome,  
24 234 and the cost-utility analysis, based on quality-adjusted life years (QALYs) from the CHU-9D, will  
25 235 adopt an NHS and Personal Social Services (PSS) perspective. PSS includes a range of services  
26 236 provided by local authorities for vulnerable groups, including the mentally and physically disabled,  
27 237 older people, and neglected children. The cost-benefit analysis will take a societal perspective and  
28 238 additionally account for costs falling on parents, and schools, as well as valuing parental wellbeing  
29 239 with the Warwick-Edinburg Mental Wellbeing Scale (WEMWBS). These analyses will adhere to  
30 240 guidelines for conducting economic evaluations alongside clinical trials and the most recent National  
31 241 Institute for Health and Care Excellence (NICE) public health reference case(32–35).

#### 32 242 **Costing: Identification, measurement, and valuation of resources**

33 243 Costing involves identifying, measuring, and valuing the resources used to deliver and participate in  
34 244 the intervention, and consequential health and social services use. In a complex system change such  
35 245 as CYPHP, the comprehensive identification of resources requires close collaboration with the  
36 246 implementation and the process evaluation teams.

37 247

#### 38 248 ***Identification of resource use***

39 249 CYPHP health and social care costs borne by the NHS and PSS mainly include time spent by medical  
40 250 professionals and service managers delivering CYPHP services, along with consequential health and  
41 251 social services utilisation by patients (**Table 3**). From a societal perspective, time spent by school  
42 252 staff participating in CYPHP and time away from work or school by parents and CYP are also  
43 253 accounted for. Because both intervention and control practices include EUC, EUC's delivery costs will  
44 254 be disregarded. Service use and time away from school and work will be considered for both CYPHP  
45 255 and EUC.

#### 46 256 ***Measurement of resource use***

47 257 Resources used to implement CYPHP will be gathered from seven data sources, including the study's  
48 258 accounting data, service caseloads, CYPHP nurse's personal caseload notes, study questionnaires,  
49 259  
50 260

primary care data, secondary care data, and interviews with CYPHP nurses (**Table 3**). EMIS will provide location, type, number and length of visits part of in-reach clinics and specialist team services. CYPHP nurse's caseload notes will supply information on specialist team training and multidisciplinary team case-planning. Time spent at lunch-and-learn sessions will be obtained from service caseloads. Patient-level service use will be gathered from primary and secondary care activity files. Family and CYP time away from work or school are questions included in the study questionnaires. Interviews with a random sample of CYPHP nurses to understand their phone usage and transportation to patient visits will also be conducted.

### **Valuation of resource use**

As with the population-level cost analysis, national unit costs for children's services will be obtained from the Unit Costs of Health and Social Care 2019 (28) and NHS reference costs for 2015-16 (29). The Unit Costs of Health and Social Care 2014 version will also be used to value referrals to social care services (36). Unit costs not available from these sources will be collected from trial records directly (e.g. monthly rent of children's health center use). All unit costs will be presented in pounds sterling (£) for a base cost year 2019/2020; the NHS Cost Inflation Index (NHSCII) will be used to adjust for inflation(36). As the horizon of the within-trial analysis is 6 and 12 months, no discounting will be applied to either costs or outcomes.

**Table 3. Identification and measurement of costs**

| Cost components                        | Description of resources used                                                                      | Unit of measure       | Source, level data collected                         |
|----------------------------------------|----------------------------------------------------------------------------------------------------|-----------------------|------------------------------------------------------|
| <b>Intervention delivery costs</b>     |                                                                                                    |                       |                                                      |
| Set-up costs                           | Hiring costs, training, materials                                                                  | Total costs           | Study's accounting data                              |
| 1.In-reach clinics                     | Paediatrician, general practitioner, mental health specialist, etc.                                | Minutes               | Primary care data (EMIS), patient                    |
| 2.Lunch-and-learn sessions             | Paediatrician, general practitioner, other child health professionals, clerks/administrative, etc. | Minutes               | Service Caseloads, service                           |
| 3.Specialist nurse-led services        | •CYPHP nurses, mental health specialists, etc.                                                     | Minutes               | Primary care data, patient                           |
|                                        | •Phone usage                                                                                       | Minutes/text messages | Interview CYPHP nurse, service                       |
|                                        | •Travel to patients (distance and mileage)                                                         | Minutes and £         | Primary care data and interview CYPHP nurse, service |
|                                        | •Children's center                                                                                 | Rent                  | Study's accounting data, service                     |
| 4.Population health management         | •Population health clinician, analyst, manager                                                     | Minutes               | Study's accounting data, service                     |
| 5.Specialist team training             | •CYPHP nurses, primary care, secondary care staff, etc.                                            | Minutes               | CYPHP nurse's caseload notes, service                |
|                                        | •School staff                                                                                      | Minutes               |                                                      |
| 6.Multidisciplinary team case-planning | •CYPHP nurses, primary care, secondary care staff, etc.                                            | Minutes               | CYPHP nurse's caseload notes, service                |
| Overhead costs                         | Using spaces, data access and storage                                                              | £                     | Study's accounting data                              |
| <b>Service use</b>                     |                                                                                                    |                       |                                                      |
|                                        | •General practitioner                                                                              | No. visits            | Primary care data and secondary care activity,       |

|                              |                         |                 |                               |
|------------------------------|-------------------------|-----------------|-------------------------------|
|                              | •Paediatrician          | No. visits      | patient                       |
|                              | •Hospital outpatient    | No. visits      |                               |
|                              | •Hospital inpatient     | No. visits      |                               |
|                              | •Accident and emergency | No. visits      |                               |
|                              | •Social care services†  | Referral yes/no |                               |
| <hr/>                        |                         |                 |                               |
| <b><i>CYP and family</i></b> |                         |                 |                               |
|                              | Time away from school   | Hours           | Study questionnaires, patient |
|                              | Time away from work     | Hours           | Study questionnaires, parent  |

Note: †CYPHP nurses may refer CYP and their families to social care services. An indicator for referrals to social services is available in primary care data. EMIS=Egton Medical information Systems. Secondary care data (inpatient stays, A&E attendances, and outpatient visits) will be obtained from Guy's and Sant Thomas' NHS Foundation Trust and King's College Hospital data.

### ***Computation of total costs***

*Total costs* will be computed at the patient level by summing *intervention delivery costs* (only CYP in intervention arm) and *health service use cost* (CYP in intervention and control arms)

- *Intervention delivery costs* will include set-up, CYPHP delivery and overhead costs. Some of these components will vary across patients (e.g., specialist team services), others across clinics (e.g., staff specialist training), and others will be the same for all patients (e.g., overhead costs such as the cost of administration and facilities). Staff specialist training costs, costs of universal services (in-reach clinics), intervention set-up costs, and overheads will each be apportioned. CYP with tracer conditions are the target population of the economic evaluation. The cost of universal services, however, also needs to be considered as CYP with tracer conditions may be referred to specialist team services during an in-reach clinic visit. Different apportioning rules will be used, for example, the costs of universal services could be apportioned by using the percentage of CYP with tracer conditions who were referred by in-reach clinics. Total per-patient apportioned costs will be added to patient-level specialist team services costs.
- *Health service use costs* will result from multiplying the quantity of services used, by their unit cost, and summing across services types for each patient.

Total costs of patients in the control arm will only reflect health service use costs.

In the cost-benefit analysis, total costs will also include costs borne by patients, parent and schools. Patient and parents' costs will be comprised of school and work time lost, respectively. Schools' costs will include time spent by school staff attending specialist team training.

### ***Measurement and valuation of health outcomes***

The trial's primary health outcome measure of the tracer conditions evaluation is the Pediatric Quality of Life Inventory (PedsQL), which will be used in the cost-effectiveness analysis. The PedsQL includes 23 items covering physical, emotional, social and school functioning(25) and is available through 6 age-specific questionnaires (0-12 months, 13-24 months, 2-4 years, 5-7 years, 8-12 years, and 13-17 years). The PedsQL has shown to be reliable, valid and responsive to meaningful change across general and disease-specific populations(25,37,38). The Child Health Utility questionnaire (CHU-9D)—a generic preference-based measure of paediatric health-related quality of life that allows the calculation of quality adjusted life years (QALYs)—will be the health outcome measure for cost-utility analysis. The 9 items of CHU-9D cover feeling worried, sad, tired, annoyed, perceptions of

1  
2  
3 312 schoolwork, sleep, daily routine, and social activities. The tool is designed to be administered to CYP  
4 313 between 7-17 years of age, and a proxy version to be completed by parents is available for younger  
5 314 children(39,40). The Warwick-Edinburg Mental Wellbeing Scale (WEMWBS) (41) will serve as a well-  
6 315 being questionnaire for parents. All questionnaires were administered at baseline and at two follow-  
7 316 up points (6 and 12 months). Questionnaires completed during the first phase of the Covid-19  
8 317 pandemic [12 March 2020 – 6 July 2020], will be repeated after this period, and follow-up measures  
9 318 delayed. Multiple imputation will be used for questionnaires with missing values.

12 319 In the cost-benefit analysis, QALYs and WEMWBS will be combined by converting both to Pound  
13 320 Sterling values. QALYs will be monetised by using the government sector willingness-to-pay of  
14 321 £20,000 to £30,000 per QALY gained(42). For WEMWBS, the monetary values published by Simetrica  
15 322 and HACT for each Short-version WEMWBS (SWEMWBS) score will be employed and converted to  
16 323 cost year 2020/2021 (43). The SWEMWBS score can be obtained from the original WEBWMS using  
17 324 seven of its 14 statements about thoughts and feelings.

### 20 325 **Statistical analyses**

22 326 The intention-to-treat population will be used in statistical analyses. First, differences between  
23 327 protocolized and actual intervention components (including inputs, frequency and duration of each  
24 328 component) will be assessed (**Table 2**). Second, univariate analyses will be conducted to describe  
25 329 sample mean differences and variability across time between treatment and control group for each  
26 330 outcome. Three time points will contribute to analysis; baseline, 6-months, and 12 months. Third, to  
27 331 adjust for treatment group imbalances, four multilevel regression models will be estimated; one  
28 332 each for total costs, QALYs, PedsQL score, and monetary benefits (£ corresponding to QALYs and  
29 333 WEBWMS scores together)(44). Each model will include a variable indicating participation in  
30 334 intervention or control and variables that, despite randomization, may still be unequally distributed  
31 335 between intervention and control groups such as age, gender and deprivation level for the patient-  
32 336 level models. For the regression model predicting QALYs, the baseline QALYs will also be controlled  
33 337 for(45). Benefits will be estimated using ordinary least squares, and costs with a GLM model with a  
34 338 gamma distribution and a log-link. Both the use of a GLM and limited dependent variable mixture  
35 339 models will be considered when modelling QALYs(46). All models will cluster standard errors to  
36 340 account for correlation of patients in the same CYPHP cluster.

41 341 For each outcome variable and intervention and control groups separately, mean predicted values  
42 342 will be generated. Three incremental cost-effectiveness ratios (difference between intervention and  
43 343 control in mean predicted costs over difference in mean predicted outcomes) will be computed, one  
44 344 for the cost-effectiveness analysis (based on PedsQL scores), another for the cost-utility analysis  
45 345 (using QALYs), and a third one for the cost-benefit analysis (£). These three ICERs will be generated  
46 346 based on 6 and 12-months data.

48 347 The pattern and amount of missing data between treatment and control groups by study variable  
49 348 will be assessed. If data is missing completely at random for both treatment and control groups and  
50 349 the percentage of missing data is below 5%, missing data will be ignored. If data is missing at random  
51 350 (MAR), multiple imputation accounting for clustering (such as fixed effects) will be used (47). When  
52 351 the data is MAR, multiple imputation can lead to consistent, asymptotically efficient, and  
53 352 asymptotically normal estimates(48).

### 56 353 **Handling uncertainty**

58 354 The level of decision uncertainty arising from sampling and assumptions on key parameter estimates  
59 355 with policy impact will be assessed. Confidence intervals for ICERs based on the non-parametric

bootstrap method will be generated(49), along with acceptability curves to reflect the probability of CYPHP being cost-effective as the willingness-to-pay per QALY (or other health outcome) increases. Deterministic sensitivity analyses on chosen variables (such as intervention set-up costs, intensity of services delivered, and social care costs) will assist in identifying key drivers of the results. Subgroup analysis of cost-effectiveness results by tracer condition and quintiles of IMD will be conducted as long as a sufficient sample size is available.

## 2.5. Long-term modelling of health and costs beyond the trial

A state-transition model reflecting natural disease progression will be developed for each tracer condition to predict the cost-effectiveness of CYPHP compared to EUC beyond the trial duration. Trial data will be used to define the health states, transition probabilities among states, and to calculate the costs and effects from an NHS/PSS perspective. Existing literature and publicly available statistics (e.g., Office of National Statistics and existing UK cohort studies) will also be used to gather transition probabilities across states beyond 12 months. A functional form characterizing the sustainability of intervention effects into the longer run (changes in health-related quality of life and health services utilisation) will be inferred based on 6 months and 12 months trial data. The effect of alternative analytic horizons on the cost-effectiveness of CYPHP versus EUC will be tested in sensitivity analyses, including 2, 5, and 10 years.

## DISCUSSION

The CYPHP Evelina London model is a health-systems strengthening programme to advance towards integrated and high-quality care for children and young people in the UK. By offering universal and targeted services, CYPHP aims to overcome patient- and provider-level barriers to effective management of physical and mental health and foster optimal health behaviour. The aims of this economic evaluation are to establish the impact of CYPHP on healthcare costs at the population level and the cost-effectiveness of the intervention among CYP with tracer conditions. Asthma, constipation, and eczema serve as examples of common long-term conditions among CYP. Lessons from managing these conditions should inform a broader health system response to the epidemiological transition to chronic diseases.

### Strengths and weaknesses

Beyond temporary trial suspension, Covid-19 may have affected our study in at least two ways. First, CYPHP delivery may not return to normal after the pandemic. Differences in the frequency and duration of each CYPHP component before and after Covid-19 will be assessed in sensitivity analyses. Second, some follow-up questionnaires were due during Covid-19. When possible, data were collected, and an additional data point after Covid-19 was included for these participants to isolate changes in health status due to the pandemic. Besides the effects of Covid-19, the intensity of services delivered as part of CYPHP may not be fully standardised across GP practices. Variability in service intensity across practices and its impact on cost-effectiveness results will be assessed in sensitivity analyses. Additionally, health utility outcome measurement for children below 5 may lack reliability as the questionnaire has not been psychometrically tested for this younger age group (26,50). This measurement challenge will be addressed by using multiple economic evaluation perspectives and health outcomes (such as the PedsQL) to provide a comprehensive and transparent assessment of the effects of the intervention.

By carrying out three economic evaluations (cost-effectiveness, cost-utility, and cost-benefit) under two different perspectives (NHS and PSS, and societal), we aim to inform stakeholders with various interests, including Clinical Commissioning Groups and evolving Integrated Care System, GP

1  
2  
3 400 Federations, Provider Trusts, CYP and their families. With CYPHP, healthcare utilisation costs may  
4 401 remain stable if primary care visits increase, but hospitalisations and emergency room visits  
5 402 decrease. Parents and children's costs related to time lost from work or school are also expected to  
6 403 decline with CYPHP if CYP's tracer conditions are well managed. Our planned analyses will allow both  
7 404 to be studied and accounted for.

8  
9  
10 405 The long-term model will assess the cost-effectiveness of CYPHP compared to EUC beyond the trial  
11 406 duration to fully capture intervention effects on children with asthma, constipation and/or eczema.  
12 407 Existing cost-effectiveness studies assessing interventions for CYP with these tracer conditions rarely  
13 408 include a long-term model, and the duration of RCTs of education, coaching, nurse-led clinics or  
14 409 treatments for the tracer conditions tend to be under three years (51–56). CYPHP is expected to  
15 410 foster long-lasting improvements beyond 12 months in health outcomes due to changes in disease  
16 411 management behaviour among the CYP and family, and also health professionals. The natural  
17 412 progression of the tracer conditions indicates that a substantial percentage of children continue to  
18 413 experience symptoms beyond 12 months, and sometimes even into adulthood. Asthma in childhood  
19 414 persists into adulthood for 79% of the cases (57). About half of children with atopic eczema still have  
20 415 the problem as adults (58,59). Twenty five percent of children with functional constipation continue  
21 416 to experience symptoms as adults (60,61).

22  
23  
24  
25 417 This study will contribute rigorous evidence about health economics of children's integrated  
26 418 healthcare in the UK, where there has been a notable paucity of high-quality evidence. Results from  
27 419 this study will directly inform decisions on children's healthcare provision in South East London and  
28 420 will provide rigorous evidence to inform policy nationally and internationally.

29  
30 421 **Ethics and dissemination:** Ethics approval was obtained from South West-Cornwall & Plymouth  
31 422 Research Ethics Committee. Results will be submitted for publication in peer-reviewed journals,  
32 423 made available in briefing papers for local decision-makers, and provided to the local community  
33 424 through website and public events. Findings will be generalisable to community-based models of  
34 425 care, especially in urban settings.

35  
36  
37 426

## 38 39 427 **References**

- 40  
41 428 1. Cheung R. International comparisons of health and wellbeing in early childhood. London  
42 429 Nuffield Trust. 2018;
- 43  
44 430 2. OECD. Health Status : Maternal and infant mortality [Internet]. [cited 2020 Sep 17]. Available  
45 431 from: <https://stats.oecd.org/index.aspx?queryid=30116#>
- 46  
47 432 3. Wolfe I, Thompson M, Gill P, Tamburlini G, Blair M, Bruel A van den, et al. Health services for  
48 433 children in western Europe. *The Lancet*. 2013 Apr 6;381(9873):1224–34.
- 49  
50 434 4. Wolfe I, Macfarlane A, Donkin A, Marmot M, Viner R. Why children die: death in infants,  
51 435 children, and young people in the UK—Part A. *Lond R Coll Paediatr Child Health*. 2014;
- 52  
53 436 5. Davies SC, Lemer C, Strelitz J, Weil L. Our children deserve better: prevention pays. *Lancet Lond*  
54 437 *Engl*. 2013 Oct 26;382(9902):1383–4.
- 55  
56 438 6. Hoey H, Aanstoot H-J, Chiarelli F, Daneman D, Danne T, Dorchy H, et al. Good Metabolic  
57 439 Control Is Associated With Better Quality of Life in 2,101 Adolescents With Type 1 Diabetes.  
58 440 *Diabetes Care*. 2001 Nov 1;24(11):1923–8.
- 59  
60



- 1  
2  
3 441 7. Sundbom F, Malinowski A, Lindberg E, Alving K, Janson C. Effects of poor asthma control,  
4 442 insomnia, anxiety and depression on quality of life in young asthmatics. *J Asthma*. 2016 Apr  
5 443 20;53(4):398–403.
- 6  
7 444 8. Boyd M, Lasserson TJ, McKean MC, Gibson PG, Ducharme FM, Haby M. Interventions for  
8 445 educating children who are at risk of asthma-related emergency department attendance.  
9 446 *Cochrane Database Syst Rev*. 2009 Apr 15;(2):CD001290.
- 10  
11 447 9. Ordoñez GA, Phelan PD, Olinsky A, Robertson CF. Preventable factors in hospital admissions for  
12 448 asthma. *Arch Dis Child*. 1998 Feb 1;78(2):143–7.
- 13  
14 449 10. Castro M, Zimmermann NA, Crocker S, Bradley J, Leven C, Schechtman KB. Asthma intervention  
15 450 program prevents readmissions in high healthcare users. *Am J Respir Crit Care Med*.  
16 451 2003;168(9):1095–9.
- 17  
18 452 11. Nunes C, Ladeira S. Asthma, from childhood to adulthood: a prospective 20-year longitudinal  
19 453 study of a cohort of asthmatics. *J Investig Allergol Clin Immunol*. 2002;12(4):242–9.
- 20  
21 454 12. Stevens CA, Turner D, Kuehni CE, Couriel JM, Silverman M. The economic impact of preschool  
22 455 asthma and wheeze. *Eur Respir J*. 2003 Jun 1;21(6):1000–6.
- 23  
24 456 13. UNICEF. Convention on the Rights of the Child [Internet]. [cited 2020 Oct 3]. Available from:  
25 457 <https://www.unicef.org/child-rights-convention>
- 26  
27 458 14. Belli PC, Bustreo F, Preker A. Investing in children’s health: what are the economic benefits?  
28 459 *Bull World Health Organ*. 2005;83:777–84.
- 29  
30 460 15. Guyer B, Ma S, Grason H, Frick K, Perry D, Wigton A, et al. INVESTMENTS TO PROMOTE  
31 461 CHILDREN ‘S HEALTH: A systematic literature review and economic analysis of interventions in  
32 462 the preschool period. Baltim MD Johns Hopkins Bloom Sch Public Health. 2008;
- 33  
34 463 16. Wolfe I, Satherley R-M, Scotney E, Newham J, Lingam R. Integrated Care Models and Child  
35 464 Health: A Meta-analysis. *Pediatrics* [Internet]. 2020 Jan 1 [cited 2020 Apr 16];145(1). Available  
36 465 from: <https://pediatrics.aappublications.org/content/145/1/e20183747>
- 37  
38 466 17. 2019 child health profiles [Internet]. GOV.UK. [cited 2020 Feb 13]. Available from:  
39 467 <https://www.gov.uk/government/statistics/2019-child-health-profiles>
- 40  
41 468 18. Newham JJ, Forman J, Heys M, Cousens S, Lemer C, Elsherbiny M, et al. Children and Young  
42 469 People’s Health Partnership (CYPHP) Evelina London model of care: protocol for an  
43 470 opportunistic cluster randomised controlled trial (cRCT) to assess child health outcomes,  
44 471 healthcare quality and health service use. *BMJ Open* [Internet]. 2019 Aug 1 [cited 2020 Feb  
45 472 13];9(8). Available from: <https://bmjopen.bmj.com/content/9/8/e027301>
- 46  
47 473 19. Satherley R-M, Green J, Sevdalis N, Newham JJ, Elsherbiny M, Forman J, et al. The Children and  
48 474 Young People’s Health Partnership Evelina London Model of Care: process evaluation protocol.  
49 475 *BMJ Open* [Internet]. 2019 Sep 3 [cited 2020 Feb 13];9(8). Available from:  
50 476 <https://www.ncbi.nlm.nih.gov/pmc/articles/PMC6731816/>
- 51  
52 477 20. Tramonti F, Giorgi F, Fanali A. Systems thinking and the biopsychosocial approach: A multilevel  
53 478 framework for patient-centred care. *Syst Res Behav Sci*. 2021;38(2):215–30.
- 54  
55  
56  
57  
58  
59  
60

- 1  
2  
3 479 21. NICE. Guide to the methods of technology appraisal 2013 [Internet]. 2013. Available from:  
4 480 <https://www.nice.org.uk/process/pmg9/chapter/foreword>  
5  
6 481 22. Charman CR, Venn AJ, Williams HC. The patient-oriented eczema measure: development and  
7 482 initial validation of a new tool for measuring atopic eczema severity from the patients'  
8 483 perspective. *Arch Dermatol*. 2004 Dec;140(12):1513–9.  
9  
10 484 23. Nathan RA, Sorkness CA, Kosinski M, Schatz M, Li JT, Marcus P, et al. Development of the  
11 485 asthma control test: a survey for assessing asthma control. *J Allergy Clin Immunol*.  
12 486 2004;113(1):59–65.  
13  
14  
15 487 24. Goodman R. Psychometric properties of the strengths and difficulties questionnaire. *J Am Acad*  
16 488 *Child Adolesc Psychiatry*. 2001;40(11):1337–45.  
17  
18 489 25. Varni J, Seid M, Rode C. The PedsQL™: Measurement Model for the Pediatric Quality of Life  
19 490 Inventory. *Med Care*. 1999 Feb;37(2):126–39.  
20  
21 491 26. Furber G, Segal L. The validity of the Child Health Utility instrument (CHU9D) as a routine  
22 492 outcome measure for use in child and adolescent mental health services. *Health Qual Life*  
23 493 *Outcomes*. 2015 Feb 18;13(1):22.  
24  
25  
26 494 27. Institute for Women and Children's Health, King's Health Partners, London, UK. Children and  
27 495 Young People's CHILDS (Children's Health Integrated Care and Learning Delivery System)  
28 496 framework. [Internet]. Available from: [childsframework.org](http://childsframework.org)  
29  
30 497 28. PSSRU. Unit Costs of Health and Social Care 2019 [Internet]. 2019. Available from:  
31 498 <https://www.pssru.ac.uk/project-pages/unit-costs/unit-costs-2019/>  
32  
33 499 29. NHS reference costs 2015 to 2016 [Internet]. GOV.UK. [cited 2020 May 21]. Available from:  
34 500 <https://www.gov.uk/government/publications/nhs-reference-costs-2015-to-2016>  
35  
36  
37 501 30. Franklin M, Lomas J, Walker S, Young T. An Educational Review About Using Cost Data for the  
38 502 Purpose of Cost-Effectiveness Analysis. *PharmacoEconomics*. 2019 May 1;37(5):631–43.  
39  
40 503 31. Mantopoulos T, Mitchell PM, Welton NJ, McManus R, Andronis L. Choice of statistical model  
41 504 for cost-effectiveness analysis and covariate adjustment: empirical application of prominent  
42 505 models and assessment of their results. *Eur J Health Econ HEPAC Health Econ Prev Care*. 2016  
43 506 Nov;17(8):927–38.  
44  
45 507 32. NICE. Methods for the development of NICE public health guidance (third edition). 2013.  
46  
47 508 33. Glick HA, Doshi JA, Sonnad SS, Polsky D. Economic evaluation in clinical trials. OUP Oxford;  
48 509 2014.  
49  
50  
51 510 34. Fox-Rushby J, Cairns J. Economic evaluation. McGraw-Hill Education (UK); 2005.  
52  
53 511 35. Ramsey SD, Willke RJ, Glick H, Reed SD, Augustovski F, Jonsson B, et al. Cost-effectiveness  
54 512 analysis alongside clinical trials II-An ISPOR Good Research Practices Task Force report. *Value*  
55 513 *Health J Int Soc Pharmacoeconomics Outcomes Res*. 2015 Mar;18(2):161–72.  
56  
57 514 36. Curtis, L. Unit Costs of Health and Social Care 2014. University of Kent: Personal Social Services  
58 515 Research Unit;

- 1  
2  
3 516 37. Chan KS, Mangione-Smith R, Burwinkle TM, Rosen M, Varni JW. The PedsQL: reliability and  
4 517 validity of the short-form generic core scales and Asthma Module. *Med Care*. 2005  
5 518 Mar;43(3):256–65.
- 7 519 38. Seid M, Limbers CA, Driscoll KA, Opiari-Arrigan LA, Gelhard LR, Varni JW. Reliability, validity,  
8 520 and responsiveness of the pediatric quality of life inventory (PedsQL) generic core scales and  
9 521 asthma symptoms scale in vulnerable children with asthma. *J Asthma Off J Assoc Care Asthma*.  
10 522 2010 Mar;47(2):170–7.
- 13 523 39. Stevens K. Developing a descriptive system for a new preference-based measure of health-  
14 524 related quality of life for children. *Qual Life Res Int J Qual Life Asp Treat Care Rehabil*. 2009  
15 525 Oct;18(8):1105–13.
- 17 526 40. Stevens K. Assessing the performance of a new generic measure of health-related quality of life  
18 527 for children and refining it for use in health state valuation. *Appl Health Econ Health Policy*.  
19 528 2011 May 1;9(3):157–69.
- 22 529 41. Tennant R, Hiller L, Fishwick R, Platt S, Joseph S, Weich S, et al. The Warwick-Edinburgh Mental  
23 530 Well-being Scale (WEMWBS): development and UK validation. *Health Qual Life Outcomes*.  
24 531 2007 Nov 27;5(1):63.
- 26 532 42. NICE. 6 Incorporating health economics | Methods for the development of NICE public health  
27 533 guidance (third edition) | Guidance | NICE [Internet]. NICE; [cited 2020 Mar 2]. Available from:  
28 534 <https://www.nice.org.uk/process/pmg4/chapter/incorporating-health-economics>
- 30 535 43. Trotter, L., Rallings Adams, M-K. Valuing improvements in mental health: Applying the  
31 536 wellbeing valuation method to WEMWBS. HACT; 2017.
- 33 537 44. Gomes M, Grieve R, Nixon R, Ng ES-W, Carpenter J, Thompson SG. Methods for Covariate  
34 538 Adjustment in Cost-Effectiveness Analysis That Use Cluster Randomised Trials. *Health Econ*.  
35 539 2012;21(9):1101–18.
- 38 540 45. Manca A, Hawkins N, Sculpher MJ. Estimating mean QALYs in trial-based cost-effectiveness  
39 541 analysis: the importance of controlling for baseline utility. *Health Econ*. 2005 May;14(5):487–  
40 542 96.
- 42 543 46. Hernández Alava M, Wailoo AJ, Ara R. Tails from the Peak District: Adjusted Limited Dependent  
43 544 Variable Mixture Models of EQ-5D Questionnaire Health State Utility Values. *Value Health*.  
44 545 2012 May 1;15(3):550–61.
- 46 546 47. DiazOrdaz K, Kenward MG, Gomes M, Grieve R. Multiple imputation methods for bivariate  
47 547 outcomes in cluster randomised trials. *Stat Med*. 2016 10;35(20):3482–96.
- 49 548 48. Paul D. Allison. *Missing Data* [Internet]. SAGE Publications Inc. 2020 [cited 2020 Feb 29].  
50 549 Available from: <https://us.sagepub.com/en-us/nam/missing-data/book9419>
- 53 550 49. Chaudhary MA, Stearns SC. Estimating confidence intervals for cost-effectiveness ratios: an  
54 551 example from a randomized trial. *Stat Med*. 1996 Jul 15;15(13):1447–58.
- 56 552 50. Frew EJ, Pallan M, Lancashire E, Hemming K, Adab P. Is utility-based quality of life associated  
57 553 with overweight in children? Evidence from the UK WAVES randomised controlled study. *BMC*  
58 554 *Pediatr* [Internet]. 2015 Dec 16 [cited 2021 May 17];15. Available from:  
59 555 <https://www.ncbi.nlm.nih.gov/pmc/articles/PMC4681167/>

- 1  
2  
3 556 51. Sullivan SD, Weiss KB, Lynn H, Mitchell H, Kattan M, Gergen PJ, et al. The cost-effectiveness of  
4 557 an inner-city asthma intervention for children. *J Allergy Clin Immunol*. 2002 Oct 1;110(4):576–  
5 558 81.
- 7 559 52. Madge P, McColl J, Paton J. Impact of a nurse-led home management training programme in  
8 560 children admitted to hospital with acute asthma: a randomised controlled study. *Thorax*. 1997  
9 561 Mar 1;52(3):223–8.
- 11 562 53. Noyes K, Bajorska A, Fisher S, Sauer J, Fagnano M, Halterman JS. Cost-effectiveness of the  
12 563 School-Based Asthma Therapy (SBAT) program. *Pediatrics*. 2013 Mar;131(3):e709-717.
- 15 564 54. Franco R, Santos AC, do Nascimento HF, Souza-Machado C, Ponte E, Souza-Machado A, et al.  
16 565 Cost-effectiveness analysis of a state funded programme for control of severe asthma. *BMC*  
17 566 *Public Health*. 2007 May 17;7(1):82.
- 19 567 55. Schuttelaar MLA, Vermeulen KM, Coenraads PJ. Costs and cost-effectiveness analysis of  
20 568 treatment in children with eczema by nurse practitioner vs. dermatologist: results of a  
21 569 randomized, controlled trial and a review of international costs. *Br J Dermatol*.  
22 570 2011;165(3):600–11.
- 25 571 56. Ismail N, Ratchford I, Proudfoot C, Gibbs J. Impact of a nurse-led clinic for chronic constipation  
26 572 in children. *J Child Health Care*. 2011 Sep 1;15(3):221–9.
- 28 573 57. Andersson M, Hedman L, Bjerg A, Forsberg B, Lundbäck B, Rönmark E. Remission and  
29 574 persistence of asthma followed from 7 to 19 years of age. *Pediatrics*. 2013 Aug;132(2):e435-  
30 575 442.
- 32 576 58. Abuabara K, Hoffstad O, Troxel A, Gelfand JM, Margolis DJ. Atopic dermatitis disease control  
33 577 and age: A cohort study. *J Allergy Clin Immunol*. 2015 Jul;136(1):190-192.e3.
- 35 578 59. Ridd MJ, King AJL, Le Roux E, Waldecker A, Huntley AL. Systematic review of self-management  
36 579 interventions for people with eczema. *Br J Dermatol*. 2017 Sep;177(3):719–34.
- 39 580 60. Auth MKH, Vora R, Farrelly P, Baillie C. Childhood constipation. *BMJ* [Internet]. 2012 Nov 13  
40 581 [cited 2020 Jun 19];345. Available from: <https://www.bmj.com/content/345/bmj.e7309>
- 42 582 61. Bongers MEJ, Wijk MP van, Reitsma JB, Benninga MA. Long-Term Prognosis for Childhood  
43 583 Constipation: Clinical Outcomes in Adulthood. *Pediatrics*. 2010 Jul 1;126(1):e156–62.

584

585 **Authors contributions**

49 586 Marina Soley-Bori: Conceptualization, Methodology, Writing - Original Draft, Writing - Review &  
50 587 Editing, Investigation, Visualisation; Raghu Lingam: Writing - Review & Editing, Funding acquisition;  
51 588 Rose-Marie Satherley: Writing - Review & Editing, Investigation. Julia Forman: Writing - Review &  
52 589 Editing. Lizzie Cecil: Writing - Review & Editing. Julia Fox-Rushby: Conceptualization, Methodology,  
53 590 Supervision, Writing - Review & Editing; Ingrid Wolfe: Writing - Review & Editing, Funding  
54 591 acquisition.

57 592 **Funding statement:** This work was supported by Guy's and St Thomas' Charity.

59 593 **Competing interest statements:** The authors declare no conflict of interest

594 **World count:** 351 abstract; main text 3947

For peer review only

1  
2  
3  
4  
5  
6  
7  
8  
9  
10  
11  
12  
13  
14  
15  
16  
17  
18  
19  
20  
21  
22  
23  
24  
25  
26  
27  
28  
29  
30  
31  
32  
33  
34  
35  
36  
37  
38  
39  
40  
41  
42  
43  
44  
45  
46  
47  
48  
49  
50  
51  
52  
53  
54  
55  
56  
57  
58  
59  
60

Figure 1. Study population and intervention flow

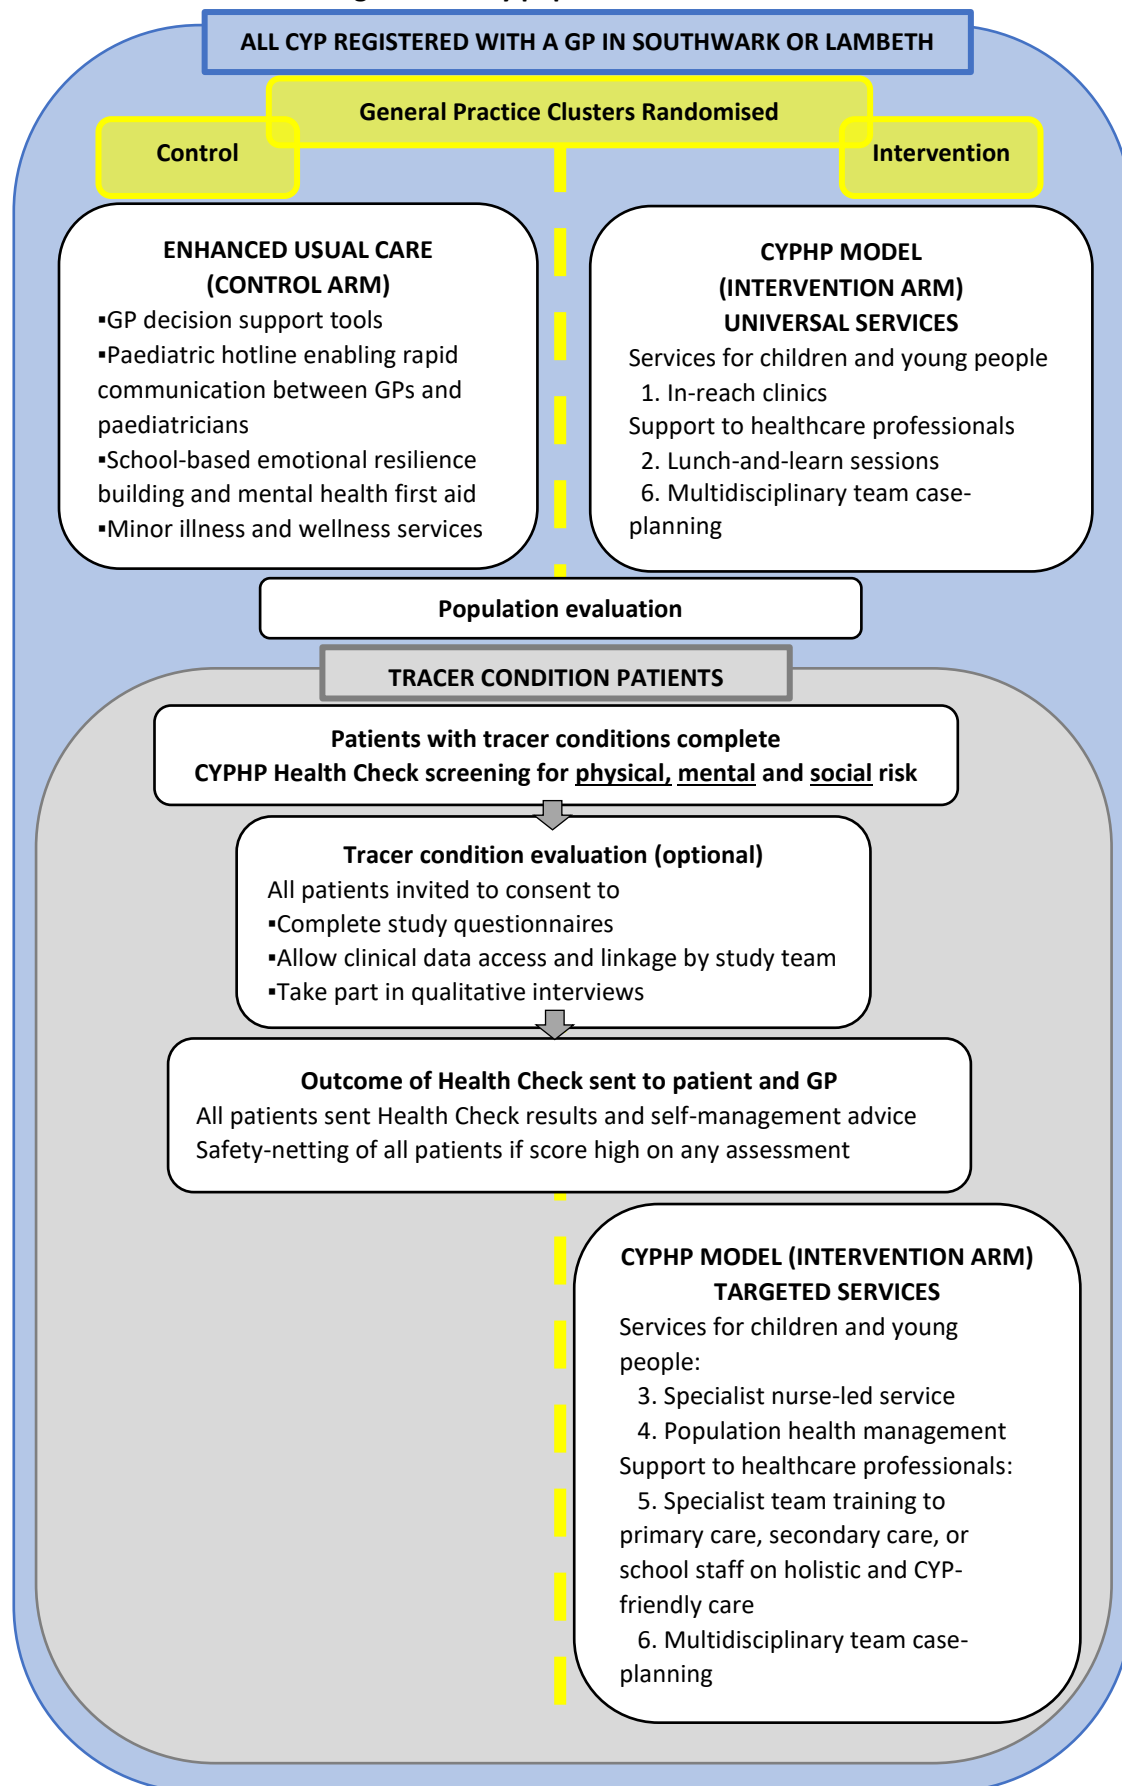

# BMJ Open

## The Children and Young People's Health Partnership Evelina London Model of Care: economic evaluation protocol of a complex system change

|                                 |                                                                                                                                                                                                                                                                                                                                                                                                                                                                                                                                                                                                                            |
|---------------------------------|----------------------------------------------------------------------------------------------------------------------------------------------------------------------------------------------------------------------------------------------------------------------------------------------------------------------------------------------------------------------------------------------------------------------------------------------------------------------------------------------------------------------------------------------------------------------------------------------------------------------------|
| Journal:                        | <i>BMJ Open</i>                                                                                                                                                                                                                                                                                                                                                                                                                                                                                                                                                                                                            |
| Manuscript ID                   | bmjopen-2020-047085.R2                                                                                                                                                                                                                                                                                                                                                                                                                                                                                                                                                                                                     |
| Article Type:                   | Protocol                                                                                                                                                                                                                                                                                                                                                                                                                                                                                                                                                                                                                   |
| Date Submitted by the Author:   | 16-Aug-2021                                                                                                                                                                                                                                                                                                                                                                                                                                                                                                                                                                                                                |
| Complete List of Authors:       | Soley-Bori, Marina; King's College London, Lingam, Raghu; University of New South Wales Faculty of Medicine, School of Women's and Children's Health Satherley, Rose-Marie; University of Surrey Forman, Julia; King's College London, Department of Women's and Children's Health Cecil, E; King's College London, Department of Women's and Children's Health Fox-Rushby, Julia; King's College London, Population Health Sciences; NIHR Biomedical Research Centre at Guy's and Saint Thomas' NHS Foundation Trust and King's College Wolfe, Ingrid; King's College London, Department of Women's and Children's Health |
| <b>Primary Subject Heading</b>: | Paediatrics                                                                                                                                                                                                                                                                                                                                                                                                                                                                                                                                                                                                                |
| Secondary Subject Heading:      | Health economics, Health policy                                                                                                                                                                                                                                                                                                                                                                                                                                                                                                                                                                                            |
| Keywords:                       | HEALTH ECONOMICS, PAEDIATRICS, Health policy < HEALTH SERVICES ADMINISTRATION & MANAGEMENT                                                                                                                                                                                                                                                                                                                                                                                                                                                                                                                                 |
|                                 |                                                                                                                                                                                                                                                                                                                                                                                                                                                                                                                                                                                                                            |

SCHOLARONE™  
Manuscripts



I, the Submitting Author has the right to grant and does grant on behalf of all authors of the Work (as defined in the below author licence), an exclusive licence and/or a non-exclusive licence for contributions from authors who are: i) UK Crown employees; ii) where BMJ has agreed a CC-BY licence shall apply, and/or iii) in accordance with the terms applicable for US Federal Government officers or employees acting as part of their official duties; on a worldwide, perpetual, irrevocable, royalty-free basis to BMJ Publishing Group Ltd ("BMJ") its licensees and where the relevant Journal is co-owned by BMJ to the co-owners of the Journal, to publish the Work in this journal and any other BMJ products and to exploit all rights, as set out in our [licence](#).

The Submitting Author accepts and understands that any supply made under these terms is made by BMJ to the Submitting Author unless you are acting as an employee on behalf of your employer or a postgraduate student of an affiliated institution which is paying any applicable article publishing charge ("APC") for Open Access articles. Where the Submitting Author wishes to make the Work available on an Open Access basis (and intends to pay the relevant APC), the terms of reuse of such Open Access shall be governed by a Creative Commons licence – details of these licences and which [Creative Commons](#) licence will apply to this Work are set out in our licence referred to above.

Other than as permitted in any relevant BMJ Author's Self Archiving Policies, I confirm this Work has not been accepted for publication elsewhere, is not being considered for publication elsewhere and does not duplicate material already published. I confirm all authors consent to publication of this Work and authorise the granting of this licence.



1  
2  
3 1 **The Children and Young People's Health Partnership Evelina London Model of Care: economic**  
4 2 **evaluation protocol of a complex system change**  
5  
6 3  
7

8 4 **Authors**

9  
10 5 Marina Soley-Bori<sup>1,6</sup>, Raghu Lingam<sup>2</sup>, Rose-Marie Satherley<sup>3</sup>, Julia Forman<sup>4,6</sup>, Lizzie Cecil<sup>4,6</sup>, and Julia  
11 6 Fox-Rushby<sup>1,5\*</sup> & Ingrid Wolfe<sup>4,6\*</sup>  
12

13 7 <sup>1</sup> School of Population Health & Environmental Sciences, Kings College London, London, UK.

14 8 <sup>2</sup> School of Women's and Children's Health, University of New South Wales, Sydney, Australia.

15 9 <sup>3</sup> Department of Psychological Interventions, University of Surrey, Guilford, UK.

16 10 <sup>4</sup> Department of Women's and Children's Health, School of Life Course Sciences, Kings College  
17 11 London, London, UK.

18 12 <sup>5</sup> NIHR Biomedical Research Centre, Guy's and St Thomas' NHS Foundation Trust and King's College  
19 13 London, London UK

20 14 <sup>6</sup> Institute for Women and Children's Health, King's Health Partners, London, UK  
21 15

22 16 \*Joint last authors  
23 17

24 18 Corresponding author

25 19 Dr Marina Soley-Bori  
26 20 King's College London  
27 21 Faculty of Life Sciences and Medicine  
28 22 School of Population Health & Environmental Sciences  
29 23 Guy's Campus, Great Maze Pond, London SE1 1UL  
30 24 [Marina.soley\\_bori@kcl.ac.uk](mailto:Marina.soley_bori@kcl.ac.uk)  
31 25

32 26 **Abstract**

33 27 **Introduction:** The Children and Young People's Health Partnership (CYPHP) Evelina London Model of  
34 28 Care is a new approach to integrated care delivery for children and young people with common  
35 29 health complaints and chronic conditions. CYPHP includes population health management (services  
36 30 shaped by data-driven understanding of population and individual needs, applied in this case to  
37 31 enable proactive case-finding and tailored biopsychosocial care), specialist clinics with  
38 32 multidisciplinary health teams, and training resources for professionals working with children and  
39 33 young people. This complex health system strengthening program has been implemented in South  
40 34 London since April 2018, and will be evaluated using a cluster randomised control trial (cRCT) with  
41 35 an embedded process evaluation. This protocol describes the within- and beyond-trial economic  
42 36 evaluation of CYPHP.  
43 37

44 38 **Methods and analysis:** The economic evaluation will identify, measure, and value resources and  
45 39 health outcome impacts of CYPHP compared with Enhanced Usual Care (EUC) from a National Health  
46 40  
47 41  
48 42  
49 43  
50 44  
51 45  
52 46  
53 47  
54 48  
55 49  
56 50  
57 51  
58 52  
59 53  
60 54

1  
2  
3 39 Service/ Personal Social Service and a broader societal perspective. The study population includes  
4 40 90,000 children and young people under 16 years of age in 23 clusters (groups of GP practices) to  
5 41 assess health service use and costs, with more detailed cost-effectiveness analysis of a targeted  
6 42 sample of 2,138 children and young people with asthma, eczema, or constipation (tracer conditions).  
7 43 For the cost-effectiveness analysis, health outcomes will be measured using the Pediatric Quality of  
8 44 Life Inventory (PedsQL) and quality-adjusted life years (QALYs) using the Child Health Utility measure  
9 45 (CHU-9D). To account for changes in parental wellbeing, the Warwick-Edinburg Mental Wellbeing  
10 46 Scale (WEMWBS) will be integrated with QALYs in a cost-benefit analysis. The within-trial economic  
11 47 evaluation will be complemented by a novel long-term model that expands the analytic horizon to  
12 48 10 years. Analyses will adhere to good practice guidelines and National Institute for Health and Care  
13 49 Excellence (NICE) public health reference case.

17 50 **Ethics and dissemination:** The study has received ethical approval from South West-Cornwall &  
18 51 Plymouth Research Ethics Committee (REC Reference: 17/SW/0275. Results will be submitted for  
19 52 publication in peer-reviewed journals, made available in briefing papers for local decision-makers,  
20 53 and provided to the local community through website and public events. Findings will be  
21 54 generalisable to community-based models of care, especially in urban settings.

24 55 **Trial registration number:** NCT03461848; Pre-results.

27 57 **Strength and limitations of this study:**

- 29 58
- 30 59 • Robust study design: CYPHP will be evaluated using a cluster randomised control trial (cRCT)  
31 60 with an embedded process evaluation.
  - 33 61 • Multiple analytic perspectives: Both the NHS and Personal Social Services (PSS) perspective  
34 62 and a societal perspective, accounting for costs falling on parents and schools, will be  
35 63 adopted.
  - 37 64
  - 38 65 • Long analytic horizon: The within-trial economic evaluation will be complemented by a novel  
39 66 long-term model that expands the analytic horizon to 10 years
  - 41 67
  - 42 68 • Impact of Covid-19 on CYPHP service delivery: Differences in the frequency and duration of  
43 69 each CYPHP component before and after Covid-19 may be observed, which will be assessed  
44 70 in sensitivity analyses.
  - 45 71
  - 46 72 • Measurement of intervention effects: The intensity of the different intervention  
47 73 components may have varied across GP practices and the measurement of health effects  
48 74 with the CHU-9D for children below 5 may lack reliability.

50 75

52 76 **Key words:** Integrated care, cost-effectiveness, decision modelling, paediatrics

54 77

56 78

57

58

59

60

## 1. INTRODUCTION

In 2018 nearly 1400 excess child deaths occurred in the UK compared with Sweden, adjusting for population size (1,2). The UK fares worse than other high-income countries in chronic disease management too. Only 16% of young people in the UK with type 1 diabetes had a glycosylated haemoglobin A1c under 7.5%, whereas in Germany and Austria this standard was met for 34% of young people (3–5). Poor chronic disease management results in worse health-related quality of life (6,7), and in higher emergency room visits and hospitalisations, which are key healthcare cost drivers (5,8–11). Beyond direct medical costs, poorly controlled chronic conditions result in time lost from school and employment, placing a significant burden on families. For example, the overall cost of caring for children with asthma aged 1–5 years in the 12 months following attendance at hospital for wheeze or asthma is estimated to be 14.53 million GBP (12).

Ensuring good health in childhood is a public health priority both as a rights-based principle (13), and for the health, social, and economic consequences in adulthood (14,15). Notwithstanding the current pandemic, the UK paediatric healthcare delivery model—originally designed to treat acute conditions through high-intensity specialist and inpatient services—now needs to address chronic health care needs and emphasise preventive care. Previous efforts to integrate care for children and young people (CYP) with ongoing conditions have shown potential for improving quality of life and reducing costs, but evidence is limited (16).

The Children and Young People’s Health Partnership (CYPHP) Evelina London Model of Care is an innovative approach to integrated healthcare delivery. It was implemented in April 2018 in two London boroughs (Lambeth and Southwark) where A&E attendance for 0-4 year olds and hospital admissions related to asthma were 16% and 25% higher than the national average, respectively. (17). The CYPHP model aims to strengthen the health system by bridging the gap between primary and secondary care, physical and mental health, and links healthcare with local efforts to tackle the socioeconomic determinants of health. Through coordinated, early intervention, and biopsychosocial care delivered in primary care and community settings, CYPHP has been developed to promote better healthcare and self-management for CYP with common health complaints and chronic conditions(18,19). The concept of biopsychosocial care follows many of the tenets of patient centred care as outlined by Tramonti and colleagues (20), however we use a more specific term to describe the model in greater detail.

CYPHP will be implemented across Southwark and Lambeth in two stages. The staged implementation offers a platform for an opportunistic clustered Randomised Control Trial (cRCT) study design for rigorous evaluation purposes, running alongside a service evaluation reporting regularly to a Partnership Board of commissioner, provider, community organisations, and researchers. In the first CYPHP deployment stage (approximately 3 years), general practices were randomised to either CYPHP (intervention) or Enhanced Usual Care (EUC—control). CYPHP includes the EUC components, but also in-reach clinics, lunch-and-learn sessions, specialist nurse-led services, population health management, specialist team training, and multidisciplinary team case planning. After three years, CYPHP will be implemented in all of the practices.

The aims of the embedded economic evaluation are, first, to assess the impact of CYPHP compared to EUC on patient-level health care costs from an NHS and Personal Social Service (PSS) perspective for the entire trial population. PSS includes a range of services provided by local authorities for vulnerable groups, including the mentally and physically disabled, older people, and neglected children. Second, among children with specific targeted tracer conditions, to compare costs and health outcomes and establish the cost-effectiveness (cost per point improvement in the PedsQL)

124 and cost-utility (cost per QALY) of CYPHP versus EUC also from an NHS and PSS perspective (NICE  
 125 reference case(21)). Third, a cost-benefit analysis (cost per monetarized unit of parental wellbeing  
 126 and children's QALYs) of CYPHP compared to EUC from a societal perspective will be conducted. The  
 127 cost-benefit analysis will also account for costs falling on parents and schools. The cost-effectiveness  
 128 of CYPHP compared to EUC beyond the trial duration will be explored with a state-transition model  
 129 reflecting natural disease progression for each tracer condition. Existing evaluations of interventions  
 130 to improve outcomes for children with tracer conditions (such as education initiatives) rarely  
 131 consider effects beyond 3 years, which may result in a partial characterization of the intervention  
 132 effects, and as such this method is a novel application in child health economic research. Both the  
 133 economic evaluation and the state-transition model are essential as they will determine whether  
 134 potential health gains related to the intervention justify its costs relative to EUC, and therefore  
 135 whether a decision to provide and roll-out the intervention is justifiable in terms of efficiency.

136 Both the population and tracer-conditions analyses aim to inform decisions on the current CYPHP  
 137 provision in Lambeth and Southwark and throughout the South East London Integrated Care System,  
 138 as well as its potential expansion to other areas if proven efficient.

## 139 2. METHODS AND ANALYSIS

### 140 2.1. Study design

141 The study design and intervention components are outlined in detailed in our published trial  
 142 protocol paper (18). In summary, seventy general practices in Southwark and Lambeth were grouped  
 143 into 23 virtual clusters, occurring naturally for GP-pediatrician co-located clinics. Twelve of these  
 144 clusters were assigned to the intervention (CYPHP) and 11 clusters to the control group (EUC). For  
 145 randomization, clusters were stratified by borough, and restricted randomization was carried out to  
 146 ensure the number of CYP under 16 years, their socioeconomic status (measured by the Index of  
 147 Multiple Deprivation and Income Deprivation Affecting Children Index), and number of outpatient  
 148 referrals were similar between the two study arms. The trial population includes CYP under 16 years  
 149 of age registered to a general practice in Southwark or Lambeth. Key information on the CYPHP  
 150 intervention and evaluation are summarized in **Table 1**.

151 **Table 1. Key features of the CYPHP intervention and evaluation**

|                                                           |                                                                                                                                                                                                                                                                                                                                                                                     |
|-----------------------------------------------------------|-------------------------------------------------------------------------------------------------------------------------------------------------------------------------------------------------------------------------------------------------------------------------------------------------------------------------------------------------------------------------------------|
| 152 Targeted recruitment sample without loss to follow-up | 1,496                                                                                                                                                                                                                                                                                                                                                                               |
| 153 Route to change                                       | <ul style="list-style-type: none"> <li>• A theoretically informed intervention (Theoretical Domains Framework)</li> <li>• Evidence based (based on systematic review on integrated care models for child health(16))</li> <li>• Integrates care in line with patient, provider, and policy perspectives – providing efficient, preventive access to care, closer to home</li> </ul> |
| 154 Main strengths                                        | <ul style="list-style-type: none"> <li>• Opportunistic randomised controlled trial</li> <li>• Rich data with both patient-reported and routine service use data</li> <li>• Embedded process evaluation to assess CYPHP implementation success</li> </ul>                                                                                                                            |
| 155 Stakeholder involvement                               | CYPHP was developed with children and young people, carers, frontline practitioners, and health service commissioners                                                                                                                                                                                                                                                               |

### 152 2.2. Intervention and control arms

1  
2  
3 153 The study structure and components of CYPHP and EUC are described in **Figure 1**. As the  
4 154 intervention arm provides CYPHP on top of EUC, EUC is delivered at all practices. CYPHP offers  
5 155 universal services (available to all CYP, with any childhood condition) and targeted services (available  
6 156 only to CYP with tracer conditions - **asthma, constipation, and/or eczema**). EUC is comprised of  
7 157 several patient self-management support tools for families and resources available to health  
8 158 providers to provide higher quality and more joined-up care for CYP.

9  
10  
11 159 Specifically, CYPHP includes:

12  
13 160     ▪ CYPHP *universal services*

- 14 161         1. *In-reach clinics*, integrated child health clinics co-delivered by patch-pediatricians  
15 162             and GPs (patch paediatricians are linked to a cluster of general practices) as part of  
16 163             a multidisciplinary CYP health team located in the community.  
17 164         2. *Lunch-and-learn sessions*, where a multidisciplinary group of CYP health  
18 165             professionals, including pediatricians and primary care staff share knowledge,  
19 166             review cases, create common professional cultures, build and reinforce team  
20 167             working practices.

21  
22  
23 168     ▪ CYPHP *targeted services (tracer conditions only)*

- 24 169         3. *Specialist nurse-led services*, usually delivered by a CYPHP nurse trained in  
25 170             biopsychosocial care (mental health and other specialists are available too if  
26 171             needed) at the CYP's home, during a visit at a community-based clinic, or through a  
27 172             phone call or message. It includes health promotion and self-management advice  
28 173             on tracer conditions. Patients are triaged and care is planned based on a pre-  
29 174             assessment biopsychosocial Health Check (CYPHP Health Check) and patient  
30 175             records. The CYPHP Health Check is administered to patients with asthma,  
31 176             constipation, or eczema. It uses validated questionnaires when possible to measure  
32 177             biopsychosocial health. Child's ongoing conditions are assessed with the Patient  
33 178             Oriented Eczema Measure (POEM)(22) for children with eczema, the Asthma  
34 179             Control Test (ACT)(23) for asthma, and a bespoke CYPHP constipation  
35 180             questionnaire (validation work underway). The Strengths and Difficulties  
36 181             Questionnaire (SDQ)(24) is used as an emotional and behavioural screening  
37 182             questionnaire. Finally, a set of bespoke social questions to understand a family's  
38 183             broader situation and factors that may affect their health and care, such as financial  
39 184             worries and days lost of school or work, are also included. Participants who consent  
40 185             as research subjects, do also complete the Paediatric Quality of Life Inventory  
41 186             (PedsQL)(25) and the Child Health Utility 9-D (CHU-9D)(26).

- 42 187         4. *Population health management*, where CYP with tracer conditions are sent text  
43 188             messages and a letter from their GP, encouraging them to participate in early  
44 189             intervention and care. Recipients are identified based on analyses of electronic health  
45 190             records and actively reached out to connect them with the healthcare system and  
46 191             improve the management of their conditions before they exacerbate.

- 47 192         5. *Specialist team training*, including education and training for primary care, secondary  
48 193             care, or school staff on evidence-based, holistic, and CYP-friendly care for tracer  
49 194             conditions, is delivered by CYPHP professionals.

50  
51  
52  
53 195 *Multidisciplinary team case-planning* is important for CYPHP delivery, present in both universal and  
54 196 targeted services. It includes case planning and both formal and informal education and training for  
55 197 professionals providing CYPHP.

198 **Table 2** describes the expected inputs, frequency, and duration of each CYPHP component. All these  
 199 data elements will be collected, as actual implementation may differ from protocolised  
 200 implementation.

201 **Table 2. Protocolised inputs, frequency, and duration of CYPHP components**

| Intervention component                         | Inputs                                                                                        | Frequency    | Duration                                           | Comments                                                                              |
|------------------------------------------------|-----------------------------------------------------------------------------------------------|--------------|----------------------------------------------------|---------------------------------------------------------------------------------------|
| <b>1. In-reach clinics</b>                     | Labour: GP and patch-paediatrician                                                            | Once a month | 20-30 min per patient                              | 2-3 hours total                                                                       |
| <b>2. Lunch-and-learn sessions</b>             | Labour: CYPHP nurse, mental health specialist, paediatrician and GP who works alongside CYPHP | Once a week  | 60 min                                             |                                                                                       |
| <b>3. Specialist nurse-led service</b>         | Labour: CYPHP nurse and mental health specialist<br>Capital: children's centre                | Varies       | 60 min (home), 30 min (general practice or school) | Service type, duration, and location tailored to CYP                                  |
| <b>4. Population health management</b>         | Labour: population health clinician, analyst, manager                                         | Varies       | Varies                                             | Data: access, storage, analysis<br>Proactive case finding: costs for sending messages |
| <b>5. Specialist team training</b>             | Labour: CYPHP nurse, primary care and secondary care staff, school staff                      | Varies       | Varies                                             | .                                                                                     |
| <b>6. Multidisciplinary team case planning</b> | Labour: CYPHP nurse, mental health specialist, paediatrician and GP who works alongside CYPHP | Once a week  | 60 min                                             | .                                                                                     |

202

203 Children and young people access universal services through referrals from their paediatrician or GP.  
 204 For specialist services, entry sources include direct referrals (from GP, paediatrician, school nurse, or  
 205 emergency department), self-referrals (availability publicized through community events, posters in  
 206 GP practices), and proactive case finding (CYP with tracer conditions are sent text messages and a  
 207 letter from their GP). Further details on CYPHP's implementation are included in the publicly  
 208 available handbook(27).

### 209 **2.3. Patient and Public Involvement**

210 Stakeholders were involved in the development of the theoretical framework for CYPHP,  
 211 identification of research questions and refining the research methodology. Stakeholders included  
 212 children and young people, carers, frontline practitioners, and health service commissioners. A  
 213 patient and public involvement group was developed with children and their families and it was  
 214 consulted with regard to evaluation design; including appropriateness of outcome measures and  
 215 consent procedures.

### 216 **2.4. Economic evaluation within the trial**

#### 217 **2.4.1. Population-level cost analysis**

218 The goal of the population-level analysis is to assess the impact of CYPHP compared to EUC on  
 219 healthcare costs of health service use. This analysis will use the whole study population, which  
 220 includes children and young people, 0-15 years of age, registered with a Southwark or Lambeth GP  
 221 practice. Health service use will include primary care consultations, visits with pediatricians, hospital  
 222 outpatient, hospital inpatient, and accident and emergency care during 6 and 12 months. Patient-  
 223 level costs will be obtained by multiplying unit costs by utilisation. National unit costs for children's  
 224 services will be obtained from the Unit Costs of Health and Social Care 2019 by the Personal Social  
 225 Services Resource Unit (28) and the NHS reference costs for 2015-16 (29). Due to the often-skewed  
 226 cost distribution with a large number of zeros and a long right-hand tail, the modified Park Test and  
 227 Pregibon Link test will assess the most appropriate distribution and link to calibrate a Generalized  
 228 linear model (GLM) for costs, for example, with a gamma distribution and a log-link (30,31). The cost  
 229 model will adjust for a binary variable indicating whether the children or young person belonged to  
 230 the intervention or control arm and any demographic variables that show imbalance between the  
 231 two groups.

#### 232 **2.4.2. Tracer conditions: cost-effectiveness/utility and cost-benefit analyses**

233 This within-trial economic evaluation will also compare CYPHP with EUC for patients under 16 with  
 234 asthma, constipation, and/or eczema. Three types of economic evaluation will be conducted. The  
 235 cost-effectiveness analysis, using point improvement in the PedsQL scale as the primary outcome,  
 236 and the cost-utility analysis, based on quality-adjusted life years (QALYs) from the CHU-9D, will  
 237 adopt an NHS and Personal Social Services (PSS) perspective. The cost-benefit analysis will take a  
 238 societal perspective and value parental wellbeing with the Warwick-Edinburg Mental Wellbeing  
 239 Scale (WEMWBS). These analyses will adhere to guidelines for conducting economic evaluations  
 240 alongside clinical trials and the most recent National Institute for Health and Care Excellence (NICE)  
 241 public health reference case(32–35).

#### 242 **Costing: Identification, measurement, and valuation of resources**

243 Costing involves identifying, measuring, and valuing the resources used to deliver and participate in  
 244 the intervention, and consequential health and social services use. In a complex system change such  
 245 as CYPHP, the comprehensive identification of resources requires close collaboration with the  
 246 implementation and the process evaluation teams.

247

#### 248 ***Identification of resource use***

249 From an NHS and PSS perspective, resources used relate to the delivery of the intervention, health  
 250 and social care use by patients, and time at school and work lost (**Table 3**). Intervention delivery  
 251 mostly includes time spent by medical professionals and service managers delivering CYPHP services.  
 252 From a societal perspective, time spent by school staff participating in CYPHP and time away from  
 253 work or school by parents and CYP are also accounted for. Because both intervention and control  
 254 practices include EUC, EUC's delivery costs will be disregarded. Service use and time away from  
 255 school and work will be considered for both CYPHP and EUC.

#### 256 ***Measurement of resource use***

257 Resources used to implement CYPHP will be gathered from seven data sources, including the study's  
 258 accounting data, service caseloads, CYPHP nurse's personal caseload notes, study questionnaires,  
 259 primary care data, secondary care data, and interviews with CYPHP nurses (**Table 3**). EMIS will  
 260 provide location, type, number and length of visits part of in-reach clinics and specialist team

261 services. CYPHP nurse's caseload notes will supply information on specialist team training and  
 262 multidisciplinary team case-planning. Time spent at lunch-and-learn sessions will be obtained from  
 263 service caseloads. Patient-level service use will be gathered from primary and secondary care activity  
 264 files. Family and CYP time away from work or school are questions included in the study  
 265 questionnaires. Interviews with a random sample of CYPHP nurses to understand their phone usage  
 266 and transportation to patient visits will also be conducted.

### 267 **Valuation of resource use**

268 As with the population-level cost analysis, national unit costs for children's services will be obtained  
 269 from the Unit Costs of Health and Social Care 2019 (28) and NHS reference costs for 2015-16 (29).  
 270 The Unit Costs of Health and Social Care 2014 version will also be used to value referrals to social  
 271 care services (36). Unit costs not available from these sources will be collected from trial records  
 272 directly (e.g. monthly rent of children's health center use). All unit costs will be presented in pounds  
 273 sterling (£) for a base cost year 2019/2020; the NHS Cost Inflation Index (NHSCII) will be used to  
 274 adjust for inflation(36). As the horizon of the within-trial analysis is 6 and 12 months, no discounting  
 275 will be applied to either costs or outcomes.

276 **Table 3. Identification and measurement of costs**

| Cost components                        | Description of resources used                                                                      | Unit of measure       | Source, level data collected                           |
|----------------------------------------|----------------------------------------------------------------------------------------------------|-----------------------|--------------------------------------------------------|
| <b>Intervention delivery costs</b>     |                                                                                                    |                       |                                                        |
| Set-up costs                           | Hiring costs, training, materials                                                                  | Total costs           | Study's accounting data                                |
| 1.In-reach clinics                     | Paediatrician, general practitioner, mental health specialist, etc.                                | Minutes               | Primary care data (EMIS), patient                      |
| 2.Lunch-and-learn sessions             | Paediatrician, general practitioner, other child health professionals, clerks/administrative, etc. | Minutes               | Service Caseloads, service                             |
| 3.Specialist nurse-led services        | •CYPHP nurses, mental health specialists, etc.                                                     | Minutes               | Primary care data, patient                             |
|                                        | •Phone usage                                                                                       | Minutes/text messages | Interview CYPHP nurse, service                         |
|                                        | •Travel to patients (distance and mileage)                                                         | Minutes and £         | Primary care data and interview CYPHP nurse, service   |
|                                        | •Children's center                                                                                 | Rent                  | Study's accounting data, service                       |
| 4.Population health management         | •Population health clinician, analyst, manager                                                     | Minutes               | Study's accounting data, service                       |
| 5.Specialist team training             | •CYPHP nurses, primary care, secondary care staff, etc.                                            | Minutes               | CYPHP nurse's caseload notes, service                  |
|                                        | •School staff                                                                                      | Minutes               |                                                        |
| 6.Multidisciplinary team case-planning | •CYPHP nurses, primary care, secondary care staff, etc.                                            | Minutes               | CYPHP nurse's caseload notes, service                  |
| Overhead costs                         | Using spaces, data access and storage                                                              | £                     | Study's accounting data                                |
| <b>Service use</b>                     |                                                                                                    |                       |                                                        |
|                                        | •General practitioner                                                                              | No. visits            | Primary care data and secondary care activity, patient |
|                                        | •Paediatrician                                                                                     | No. visits            |                                                        |
|                                        | •Hospital outpatient                                                                               | No. visits            |                                                        |



|                       |                         |                 |                               |
|-----------------------|-------------------------|-----------------|-------------------------------|
|                       | •Hospital inpatient     | No. visits      |                               |
|                       | •Accident and emergency | No. visits      |                               |
|                       | •Social care services†  | Referral yes/no |                               |
| <b>CYP and family</b> |                         |                 |                               |
|                       | Time away from school   | Hours           | Study questionnaires, patient |
|                       | Time away from work     | Hours           | Study questionnaires, parent  |

Note: †CYPHP nurses may refer CYP and their families to social care services. An indicator for referrals to social services is available in primary care data. EMIS=Egton Medical information Systems. Secondary care data (inpatient stays, A&E attendances, and outpatient visits) will be obtained from Guy's and Sant Thomas' NHS Foundation Trust and King's College Hospital data.

### Computation of total costs

Total costs will be computed at the patient level by summing *intervention delivery costs* (only CYP in intervention arm) and *health service use cost* (CYP in intervention and control arms)

- *Intervention delivery costs* will include set-up, CYPHP delivery and overhead costs. Some of these components will vary across patients (e.g., specialist team services), others across clinics (e.g., staff specialist training), and others will be the same for all patients (e.g., overhead costs such as the cost of administration and facilities). Staff specialist training costs, costs of universal services (in-reach clinics), intervention set-up costs, and overheads will each be apportioned. CYP with tracer conditions are the target population of the economic evaluation. The cost of universal services, however, also needs to be considered as CYP with tracer conditions may be referred to specialist team services during an in-reach clinic visit. Different apportioning rules will be used, for example, the costs of universal services could be apportioned by using the percentage of CYP with tracer conditions who were referred by in-reach clinics. Total per-patient apportioned costs will be added to patient-level specialist team services costs.
- *Health service use costs* will result from multiplying the quantity of services used, by their unit cost, and summing across services types for each patient.

Total costs of patients in the control arm will only reflect health service use costs.

In the cost-benefit analysis, total costs will also include costs borne by patients, parent and schools. Patient and parents' costs will be comprised of school and work time lost, respectively. Schools' costs will include time spent by school staff attending specialist team training.

### Measurement and valuation of health outcomes

The trial's primary health outcome measure of the tracer conditions evaluation is the Pediatric Quality of Life Inventory (PedsQL), which will be used in the cost-effectiveness analysis. The PedsQL includes 23 items covering physical, emotional, social and school functioning(25) and is available through 6 age-specific questionnaires (0-12 months, 13-24 months, 2-4 years, 5-7 years, 8-12 years, and 13-17 years). The PedsQL has shown to be reliable, valid and responsive to meaningful change across general and disease-specific populations(25,37,38). The Child Health Utility questionnaire (CHU-9D)—a generic preference-based measure of paediatric health-related quality of life that allows the calculation of quality adjusted life years (QALYs)—will be the health outcome measure for cost-utility analysis. The 9 items of CHU-9D cover feeling worried, sad, tired, annoyed, perceptions of schoolwork, sleep, daily routine, and social activities. The tool is designed to be administered to CYP between 7-17 years of age, and a proxy version to be completed by parents is available for younger

1  
2  
3 314 children(39,40). The WEMWBS (41) will serve as a well-being questionnaire for parents. All  
4 315 questionnaires were administered at baseline and at two follow-up points (6 and 12 months).  
5 316 Questionnaires completed during the first phase of the Covid-19 pandemic [12 March 2020 – 6 July  
6 317 2020], will be repeated after this period, and follow-up measures delayed.

7  
8  
9 318 In the cost-benefit analysis, QALYs and WEMWBS will be combined by converting both to Pound  
10 319 Sterling values. QALYs will be monetised by using the government sector willingness-to-pay of  
11 320 £20,000 to £30,000 per QALY gained(42). For WEMWBS, the monetary values published by Simetrica  
12 321 and HACT for each Short-version WEMWBS (SWEMWBS) score will be employed and converted to  
13 322 cost year 2020/2021 (43). The SWEMWBS score can be obtained from the original WEBWMS using  
14 323 seven of its 14 statements about thoughts and feelings.

## 16 324 **Statistical analyses**

17  
18 325 The intention-to-treat population will be used in statistical analyses. First, differences between  
19 326 protocolized and actual intervention components (including inputs, frequency and duration of each  
20 327 component) will be assessed (**Table 2**). Second, univariate analyses will be conducted to describe  
21 328 sample mean differences and variability across time between treatment and control group for each  
22 329 outcome. Three time points will contribute to analysis; baseline, 6-months, and 12 months. Third, to  
23 330 adjust for treatment group imbalances, four multilevel regression models will be estimated; one  
24 331 each for total costs, QALYs, PedsQL score, and monetary benefits (£ corresponding to QALYs and  
25 332 WEBWMS scores together)(44). Each model will include a variable indicating participation in  
26 333 intervention or control and variables that, despite randomization, may still be unequally distributed  
27 334 between intervention and control groups such as age, gender and deprivation level for the patient-  
28 335 level models. For the regression model predicting QALYs, the baseline QALYs will also be controlled  
29 336 for(45). Benefits will be estimated using ordinary least squares, and costs with a GLM model with a  
30 337 gamma distribution and a log-link. Both the use of a GLM and limited dependent variable mixture  
31 338 models will be considered when modelling QALYs(46). All models will cluster standard errors to  
32 339 account for correlation of patients in the same CYPHP cluster.

33  
34  
35  
36  
37 340 For each outcome variable and intervention and control groups separately, mean predicted values  
38 341 will be generated. Three incremental cost-effectiveness ratios (difference between intervention and  
39 342 control in mean predicted costs over difference in mean predicted outcomes) will be computed, one  
40 343 for the cost-effectiveness analysis (based on PedsQL scores), another for the cost-utility analysis  
41 344 (using QALYs), and a third one for the cost-benefit analysis (£). These three ICERs will be generated  
42 345 based on 6 and 12-months data.

43  
44  
45 346 The pattern and amount of missing data between treatment and control groups by study variable  
46 347 will be assessed. If data is missing completely at random for both treatment and control groups and  
47 348 the percentage of missing data is below 5%, missing data will be ignored. If data is missing at random  
48 349 (MAR), multiple imputation accounting for clustering (such as fixed effects) will be used (47). When  
49 350 the data is MAR, multiple imputation can lead to consistent, asymptotically efficient, and  
50 351 asymptotically normal estimates(48).

## 53 352 **Handling uncertainty**

54  
55 353 The level of decision uncertainty arising from sampling and assumptions on key parameter estimates  
56 354 with policy impact will be assessed. Confidence intervals for ICERs based on the non-parametric  
57 355 bootstrap method will be generated(49), along with acceptability curves to reflect the probability of  
58 356 CYPHP being cost-effective as the willingness-to-pay per QALY (or other health outcome) increases.  
59 357 Deterministic sensitivity analyses on chosen variables (such as intervention set-up costs, intensity of

1  
2  
3 358 services delivered, and social care costs) will assist in identifying key drivers of the results. Subgroup  
4 359 analysis of cost-effectiveness results by tracer condition and quintiles of IMD will be conducted as  
5 360 long as a sufficient sample size is available.

## 7 361 **2.5. Long-term modelling of health and costs beyond the trial**

9 362 A state-transition model reflecting natural disease progression will be developed for each tracer  
10 363 condition to predict the cost-effectiveness of CYPHP compared to EUC beyond the trial duration.  
11 364 Trial data will be used to define the health states, transition probabilities among states, and to  
12 365 calculate the costs and effects from an NHS/PSS perspective. Existing literature and publicly available  
13 366 statistics (e.g., Office of National Statistics and existing UK cohort studies) will also be used to gather  
14 367 transition probabilities across states beyond 12 months. A functional form characterizing the  
15 368 sustainability of intervention effects into the longer run (changes in health-related quality of life and  
16 369 health services utilisation) will be inferred based on 6 months and 12 months trial data. The effect of  
17 370 alternative analytic horizons on the cost-effectiveness of CYPHP versus EUC will be tested in  
18 371 sensitivity analyses, including 2, 5, and 10 years.

## 22 372 **DISCUSSION**

24 373 The CYPHP Evelina London model is a health-systems strengthening programme to advance towards  
25 374 integrated and high-quality care for children and young people in the UK. By offering universal and  
26 375 targeted services, CYPHP aims to overcome patient- and provider-level barriers to effective  
27 376 management of physical and mental health and foster optimal health behaviour. The aims of this  
28 377 economic evaluation are to establish the impact of CYPHP on healthcare costs at the population  
29 378 level and the cost-effectiveness of the intervention among CYP with tracer conditions. Asthma,  
30 379 constipation, and eczema serve as examples of common long-term conditions among CYP. Lessons  
31 380 from managing these conditions should inform a broader health system response to the  
32 381 epidemiological transition to chronic diseases.

### 35 382 **Strengths and weaknesses**

37 383 Beyond temporary trial suspension, Covid-19 may have affected our study in at least two ways. First,  
38 384 CYPHP delivery may not return to normal after the pandemic. Differences in the frequency and  
39 385 duration of each CYPHP component before and after Covid-19 will be assessed in sensitivity  
40 386 analyses. Second, some follow-up questionnaires were due during Covid-19. When possible, data  
41 387 were collected, and an additional data point after Covid-19 was included for these participants to  
42 388 isolate changes in health status due to the pandemic. Besides the effects of Covid-19, the intensity of  
43 389 services delivered as part of CYPHP may not be fully standardised across GP practices. Variability in  
44 390 service intensity across practices and its impact on cost-effectiveness results will be assessed in  
45 391 sensitivity analyses. Additionally, health utility outcome measurement for children below 5 may lack  
46 392 reliability as the questionnaire has not been psychometrically tested for this younger age group  
47 393 (26,50). This measurement challenge will be addressed by using multiple economic evaluation  
48 394 perspectives and health outcomes (such as the PedsQL) to provide a comprehensive and transparent  
49 395 assessment of the effects of the intervention.

53 396 By carrying out three economic evaluations (cost-effectiveness, cost-utility, and cost-benefit) under  
54 397 two different perspectives (NHS and PSS, and societal), we aim to inform stakeholders with various  
55 398 interests, including Clinical Commissioning Groups and evolving Integrated Care System, GP  
56 399 Federations, Provider Trusts, CYP and their families. With CYPHP, healthcare utilisation costs may  
57 400 remain stable if primary care visits increase, but hospitalisations and emergency room visits  
58 401 decrease. Parents and children's costs related to time lost from work or school are also expected to

1  
2  
3 402 decline with CYPHP if CYP's tracer conditions are well managed. Our planned analyses will allow both  
4 403 to be studied and accounted for.

6 404 The long-term model will assess the cost-effectiveness of CYPHP compared to EUC beyond the trial  
7 405 duration to fully capture intervention effects on children with asthma, constipation and/or eczema.  
8 406 Existing cost-effectiveness studies assessing interventions for CYP with these tracer conditions rarely  
9 407 include a long-term model, and the duration of RCTs of education, coaching, nurse-led clinics or  
10 408 treatments for the tracer conditions tend to be under three years (51–56). CYPHP is expected to  
11 409 foster long-lasting improvements beyond 12 months in health outcomes due to changes in disease  
12 410 management behaviour among the CYP and family, and also health professionals. The natural  
13 411 progression of the tracer conditions indicates that a substantial percentage of children continue to  
14 412 experience symptoms beyond 12 months, and sometimes even into adulthood. Asthma in childhood  
15 413 persists into adulthood for 79% of the cases (57). About half of children with atopic eczema still have  
16 414 the problem as adults (58,59). Twenty five percent of children with functional constipation continue  
17 415 to experience symptoms as adults (60,61).

21 416 This study will contribute rigorous evidence about health economics of children's integrated  
22 417 healthcare in the UK, where there has been a notable paucity of high-quality evidence. Results from  
23 418 this study will directly inform decisions on children's healthcare provision in South East London and  
24 419 will provide rigorous evidence to inform policy nationally and internationally.

27 420 **Ethics and dissemination:** Ethics approval was obtained from South West-Cornwall & Plymouth  
28 421 Research Ethics Committee. Results will be submitted for publication in peer-reviewed journals,  
29 422 made available in briefing papers for local decision-makers, and provided to the local community  
30 423 through website and public events. Findings will be generalisable to community-based models of  
31 424 care, especially in urban settings.

33 425

35 426

37 427

39 428

41 429

43 430

45 431

47 432

49 433

51 434

53 435

55 436

57 437

59 438

60 439

**Figure 1. Study population and intervention flow**

For peer review only

1  
2  
3 440  
4  
5 441  
6  
7 442  
8  
9 443  
10  
11 444  
12  
13 445  
14  
15 446  
16  
17 447  
18  
19 448  
20  
21 449  
22  
23 450  
24  
25 451  
26  
27 452  
28  
29 453  
30  
31 454  
32  
33 455  
34  
35 456  
36  
37 457  
38  
39 458  
40  
41 459  
42  
43 460  
44  
45 461  
46  
47 462  
48  
49 463  
50  
51 464  
52  
53 465  
54  
55 466  
56  
57 467  
58  
59 468  
60  
61 469  
62  
63 470

471 **References**

- 472 1. Cheung R. International comparisons of health and wellbeing in early childhood. London  
473 Nuffield Trust. 2018;
- 474 2. OECD. Health Status : Maternal and infant mortality [Internet]. [cited 2020 Sep 17]. Available  
475 from: <https://stats.oecd.org/index.aspx?queryid=30116#>
- 476 3. Wolfe I, Thompson M, Gill P, Tamburlini G, Blair M, Bruel A van den, et al. Health services for  
477 children in western Europe. *The Lancet*. 2013 Apr 6;381(9873):1224–34.
- 478 4. Wolfe I, Macfarlane A, Donkin A, Marmot M, Viner R. Why children die: death in infants,  
479 children, and young people in the UK—Part A. *Lond R Coll Paediatr Child Health*. 2014;
- 480 5. Davies SC, Lemer C, Strelitz J, Weil L. Our children deserve better: prevention pays. *Lancet Lond*  
481 *Engl*. 2013 Oct 26;382(9902):1383–4.
- 482 6. Hoey H, Aanstoot H-J, Chiarelli F, Daneman D, Danne T, Dorchy H, et al. Good Metabolic  
483 Control Is Associated With Better Quality of Life in 2,101 Adolescents With Type 1 Diabetes.  
484 *Diabetes Care*. 2001 Nov 1;24(11):1923–8.
- 485 7. Sundbom F, Malinowski A, Lindberg E, Alving K, Janson C. Effects of poor asthma control,  
486 insomnia, anxiety and depression on quality of life in young asthmatics. *J Asthma*. 2016 Apr  
487 20;53(4):398–403.
- 488 8. Boyd M, Lasserson TJ, McKean MC, Gibson PG, Ducharme FM, Haby M. Interventions for  
489 educating children who are at risk of asthma-related emergency department attendance.  
490 *Cochrane Database Syst Rev*. 2009 Apr 15;(2):CD001290.
- 491 9. Ordoñez GA, Phelan PD, Olinsky A, Robertson CF. Preventable factors in hospital admissions for  
492 asthma. *Arch Dis Child*. 1998 Feb 1;78(2):143–7.
- 493 10. Castro M, Zimmermann NA, Crocker S, Bradley J, Leven C, Schechtman KB. Asthma intervention  
494 program prevents readmissions in high healthcare users. *Am J Respir Crit Care Med*.  
495 2003;168(9):1095–9.
- 496 11. Nunes C, Ladeira S. Asthma, from childhood to adulthood: a prospective 20-year longitudinal  
497 study of a cohort of asthmatics. *J Investig Allergol Clin Immunol*. 2002;12(4):242–9.
- 498 12. Stevens CA, Turner D, Kuehni CE, Couriel JM, Silverman M. The economic impact of preschool  
499 asthma and wheeze. *Eur Respir J*. 2003 Jun 1;21(6):1000–6.
- 500 13. UNICEF. Convention on the Rights of the Child [Internet]. [cited 2020 Oct 3]. Available from:  
501 <https://www.unicef.org/child-rights-convention>
- 502 14. Belli PC, Bustreo F, Preker A. Investing in children’s health: what are the economic benefits?  
503 *Bull World Health Organ*. 2005;83:777–84.
- 504 15. Guyer B, Ma S, Grason H, Frick K, Perry D, Wigton A, et al. INVESTMENTS TO PROMOTE  
505 CHILDREN ‘S HEALTH: A systematic literature review and economic analysis of interventions in  
506 the preschool period. *Baltim MD Johns Hopkins Bloom Sch Public Health*. 2008;

- 1  
2  
3 507 16. Wolfe I, Satherley R-M, Scotney E, Newham J, Lingam R. Integrated Care Models and Child  
4 508 Health: A Meta-analysis. *Pediatrics* [Internet]. 2020 Jan 1 [cited 2020 Apr 16];145(1). Available  
5 509 from: <https://pediatrics.aappublications.org/content/145/1/e20183747>  
6  
7 510 17. 2019 child health profiles [Internet]. GOV.UK. [cited 2020 Feb 13]. Available from:  
8 511 <https://www.gov.uk/government/statistics/2019-child-health-profiles>  
9  
10 512 18. Newham JJ, Forman J, Heys M, Cousens S, Lemer C, Elsherbiny M, et al. Children and Young  
11 513 People's Health Partnership (CYPHP) Evelina London model of care: protocol for an  
12 514 opportunistic cluster randomised controlled trial (cRCT) to assess child health outcomes,  
13 515 healthcare quality and health service use. *BMJ Open* [Internet]. 2019 Aug 1 [cited 2020 Feb  
14 516 13];9(8). Available from: <https://bmjopen.bmj.com/content/9/8/e027301>  
15  
16 517 19. Satherley R-M, Green J, Sevdalis N, Newham JJ, Elsherbiny M, Forman J, et al. The Children and  
17 518 Young People's Health Partnership Evelina London Model of Care: process evaluation protocol.  
18 519 *BMJ Open* [Internet]. 2019 Sep 3 [cited 2020 Feb 13];9(8). Available from:  
19 520 <https://www.ncbi.nlm.nih.gov/pmc/articles/PMC6731816/>  
20  
21 521 20. Tramonti F, Giorgi F, Fanali A. Systems thinking and the biopsychosocial approach: A multilevel  
22 522 framework for patient-centred care. *Syst Res Behav Sci*. 2021;38(2):215–30.  
23  
24 523 21. NICE. Guide to the methods of technology appraisal 2013 [Internet]. 2013. Available from:  
25 524 <https://www.nice.org.uk/process/pmg9/chapter/foreword>  
26  
27 525 22. Charman CR, Venn AJ, Williams HC. The patient-oriented eczema measure: development and  
28 526 initial validation of a new tool for measuring atopic eczema severity from the patients'  
29 527 perspective. *Arch Dermatol*. 2004 Dec;140(12):1513–9.  
30  
31 528 23. Nathan RA, Sorkness CA, Kosinski M, Schatz M, Li JT, Marcus P, et al. Development of the  
32 529 asthma control test: a survey for assessing asthma control. *J Allergy Clin Immunol*.  
33 530 2004;113(1):59–65.  
34  
35 531 24. Goodman R. Psychometric properties of the strengths and difficulties questionnaire. *J Am Acad*  
36 532 *Child Adolesc Psychiatry*. 2001;40(11):1337–45.  
37  
38 533 25. Varni J, Seid M, Rode C. The PedsQL™: Measurement Model for the Pediatric Quality of Life  
39 534 Inventory. *Med Care*. 1999 Feb;37(2):126–39.  
40  
41 535 26. Furber G, Segal L. The validity of the Child Health Utility instrument (CHU9D) as a routine  
42 536 outcome measure for use in child and adolescent mental health services. *Health Qual Life*  
43 537 *Outcomes*. 2015 Feb 18;13(1):22.  
44  
45 538 27. Institute for Women and Children's Health, King's Health Partners, London, UK. Children and  
46 539 Young People's CHILDS (Children's Health Integrated Care and Learning Delivery System)  
47 540 framework. [Internet]. Available from: [childsframework.org](http://childsframework.org)  
48  
49 541 28. PSSRU. Unit Costs of Health and Social Care 2019 [Internet]. 2019. Available from:  
50 542 <https://www.pssru.ac.uk/project-pages/unit-costs/unit-costs-2019/>  
51  
52 543 29. NHS reference costs 2015 to 2016 [Internet]. GOV.UK. [cited 2020 May 21]. Available from:  
53 544 <https://www.gov.uk/government/publications/nhs-reference-costs-2015-to-2016>  
54  
55  
56  
57  
58  
59  
60

- 1  
2  
3 545 30. Franklin M, Lomas J, Walker S, Young T. An Educational Review About Using Cost Data for the  
4 546 Purpose of Cost-Effectiveness Analysis. *Pharmacoeconomics*. 2019 May 1;37(5):631–43.
- 5  
6 547 31. Mantopoulos T, Mitchell PM, Welton NJ, McManus R, Andronis L. Choice of statistical model  
7 548 for cost-effectiveness analysis and covariate adjustment: empirical application of prominent  
8 549 models and assessment of their results. *Eur J Health Econ HEPAC Health Econ Prev Care*. 2016  
9 550 Nov;17(8):927–38.
- 10  
11 551 32. NICE. *Methods for the development of NICE public health guidance (third edition)*. 2013.
- 12  
13  
14 552 33. Glick HA, Doshi JA, Sonnad SS, Polsky D. *Economic evaluation in clinical trials*. OUP Oxford;  
15 553 2014.
- 16  
17 554 34. Fox-Rushby J, Cairns J. *Economic evaluation*. McGraw-Hill Education (UK); 2005.
- 18  
19 555 35. Ramsey SD, Willke RJ, Glick H, Reed SD, Augustovski F, Jonsson B, et al. Cost-effectiveness  
20 556 analysis alongside clinical trials II-An ISPOR Good Research Practices Task Force report. *Value*  
21 557 *Health J Int Soc Pharmacoeconomics Outcomes Res*. 2015 Mar;18(2):161–72.
- 22  
23  
24 558 36. Curtis, L. *Unit Costs of Health and Social Care 2014*. University of Kent: Personal Social Services  
25 559 Research Unit;
- 26  
27 560 37. Chan KS, Mangione-Smith R, Burwinkle TM, Rosen M, Varni JW. The PedsQL: reliability and  
28 561 validity of the short-form generic core scales and Asthma Module. *Med Care*. 2005  
29 562 Mar;43(3):256–65.
- 30  
31 563 38. Seid M, Limbers CA, Driscoll KA, Opipari-Arrigan LA, Gelhard LR, Varni JW. Reliability, validity,  
32 564 and responsiveness of the pediatric quality of life inventory (PedsQL) generic core scales and  
33 565 asthma symptoms scale in vulnerable children with asthma. *J Asthma Off J Assoc Care Asthma*.  
34 566 2010 Mar;47(2):170–7.
- 35  
36  
37 567 39. Stevens K. Developing a descriptive system for a new preference-based measure of health-  
38 568 related quality of life for children. *Qual Life Res Int J Qual Life Asp Treat Care Rehabil*. 2009  
39 569 Oct;18(8):1105–13.
- 40  
41 570 40. Stevens K. Assessing the performance of a new generic measure of health-related quality of life  
42 571 for children and refining it for use in health state valuation. *Appl Health Econ Health Policy*.  
43 572 2011 May 1;9(3):157–69.
- 44  
45 573 41. Tennant R, Hiller L, Fishwick R, Platt S, Joseph S, Weich S, et al. The Warwick-Edinburgh Mental  
46 574 Well-being Scale (WEMWBS): development and UK validation. *Health Qual Life Outcomes*.  
47 575 2007 Nov 27;5(1):63.
- 48  
49  
50 576 42. NICE. 6 Incorporating health economics | *Methods for the development of NICE public health*  
51 577 *guidance (third edition) | Guidance | NICE [Internet]*. NICE; [cited 2020 Mar 2]. Available from:  
52 578 <https://www.nice.org.uk/process/pmg4/chapter/incorporating-health-economics>
- 53  
54 579 43. Trotter, L., Rallings Adams, M-K. *Valuing improvements in mental health: Applying the*  
55 580 *wellbeing valuation method to WEMWBS*. HACT; 2017.
- 56  
57 581 44. Gomes M, Grieve R, Nixon R, Ng ES-W, Carpenter J, Thompson SG. *Methods for Covariate*  
58 582 *Adjustment in Cost-Effectiveness Analysis That Use Cluster Randomised Trials*. *Health Econ*.  
59 583 2012;21(9):1101–18.



- 1  
2  
3 584 45. Manca A, Hawkins N, Sculpher MJ. Estimating mean QALYs in trial-based cost-effectiveness  
4 585 analysis: the importance of controlling for baseline utility. *Health Econ.* 2005 May;14(5):487–  
5 586 96.
- 7 587 46. Hernández Alava M, Wailoo AJ, Ara R. Tails from the Peak District: Adjusted Limited Dependent  
8 588 Variable Mixture Models of EQ-5D Questionnaire Health State Utility Values. *Value Health.*  
9 589 2012 May 1;15(3):550–61.
- 12 590 47. DiazOrdaz K, Kenward MG, Gomes M, Grieve R. Multiple imputation methods for bivariate  
13 591 outcomes in cluster randomised trials. *Stat Med.* 2016 10;35(20):3482–96.
- 15 592 48. Paul D. Allison. *Missing Data* [Internet]. SAGE Publications Inc. 2020 [cited 2020 Feb 29].  
16 593 Available from: <https://us.sagepub.com/en-us/nam/missing-data/book9419>
- 18 594 49. Chaudhary MA, Stearns SC. Estimating confidence intervals for cost-effectiveness ratios: an  
19 595 example from a randomized trial. *Stat Med.* 1996 Jul 15;15(13):1447–58.
- 22 596 50. Frew EJ, Pallan M, Lancashire E, Hemming K, Adab P. Is utility-based quality of life associated  
23 597 with overweight in children? Evidence from the UK WAVES randomised controlled study. *BMC*  
24 598 *Pediatr* [Internet]. 2015 Dec 16 [cited 2021 May 17];15. Available from:  
25 599 <https://www.ncbi.nlm.nih.gov/pmc/articles/PMC4681167/>
- 27 600 51. Sullivan SD, Weiss KB, Lynn H, Mitchell H, Kattan M, Gergen PJ, et al. The cost-effectiveness of  
28 601 an inner-city asthma intervention for children. *J Allergy Clin Immunol.* 2002 Oct 1;110(4):576–  
29 602 81.
- 31 603 52. Madge P, McColl J, Paton J. Impact of a nurse-led home management training programme in  
32 604 children admitted to hospital with acute asthma: a randomised controlled study. *Thorax.* 1997  
33 605 Mar 1;52(3):223–8.
- 36 606 53. Noyes K, Bajorska A, Fisher S, Sauer J, Fagnano M, Halterman JS. Cost-effectiveness of the  
37 607 School-Based Asthma Therapy (SBAT) program. *Pediatrics.* 2013 Mar;131(3):e709-717.
- 39 608 54. Franco R, Santos AC, do Nascimento HF, Souza-Machado C, Ponte E, Souza-Machado A, et al.  
40 609 Cost-effectiveness analysis of a state funded programme for control of severe asthma. *BMC*  
41 610 *Public Health.* 2007 May 17;7(1):82.
- 43 611 55. Schuttelaar MLA, Vermeulen KM, Coenraads PJ. Costs and cost-effectiveness analysis of  
44 612 treatment in children with eczema by nurse practitioner vs. dermatologist: results of a  
45 613 randomized, controlled trial and a review of international costs. *Br J Dermatol.*  
46 614 2011;165(3):600–11.
- 49 615 56. Ismail N, Ratchford I, Proudfoot C, Gibbs J. Impact of a nurse-led clinic for chronic constipation  
50 616 in children. *J Child Health Care.* 2011 Sep 1;15(3):221–9.
- 52 617 57. Andersson M, Hedman L, Bjerg A, Forsberg B, Lundbäck B, Rönmark E. Remission and  
53 618 persistence of asthma followed from 7 to 19 years of age. *Pediatrics.* 2013 Aug;132(2):e435-  
54 619 442.
- 56 620 58. Abuabara K, Hoffstad O, Troxel A, Gelfand JM, Margolis DJ. Atopic dermatitis disease control  
57 621 and age: A cohort study. *J Allergy Clin Immunol.* 2015 Jul;136(1):190-192.e3.

- 1  
2  
3 622 59. Ridd MJ, King AJL, Le Roux E, Waldecker A, Huntley AL. Systematic review of self-management  
4 623 interventions for people with eczema. Br J Dermatol. 2017 Sep;177(3):719–34.  
5  
6 624 60. Auth MKH, Vora R, Farrelly P, Baillie C. Childhood constipation. BMJ [Internet]. 2012 Nov 13  
7 625 [cited 2020 Jun 19];345. Available from: <https://www.bmj.com/content/345/bmj.e7309>  
8  
9 626 61. Bongers MEJ, Wijk MP van, Reitsma JB, Benninga MA. Long-Term Prognosis for Childhood  
10 627 Constipation: Clinical Outcomes in Adulthood. Pediatrics. 2010 Jul 1;126(1):e156–62.  
11  
12  
13 628

14  
15 629 **Authors contributions**

16 630 Marina Soley-Bori: Conceptualization, Methodology, Writing - Original Draft, Writing - Review &  
17 631 Editing, Investigation, Visualisation; Raghu Lingam: Writing - Review & Editing, Funding acquisition;  
18 632 Rose-Marie Satherley: Writing - Review & Editing, Investigation. Julia Forman: Writing - Review &  
19 633 Editing. Lizzie Cecil: Writing - Review & Editing. Julia Fox-Rushby: Conceptualization, Methodology,  
20 634 Supervision, Writing - Review & Editing; Ingrid Wolfe: Writing - Review & Editing, Funding  
21 635 acquisition.  
22  
23

24 636 **Funding statement:** This work was supported by Guy's and St Thomas' Charity.

25 637 **Competing interest statements:** The authors declare no conflict of interest

26 638 **World count:** 351 abstract ; main text 3947  
27  
28  
29  
30  
31  
32  
33  
34  
35  
36  
37  
38  
39  
40  
41  
42  
43  
44  
45  
46  
47  
48  
49  
50  
51  
52  
53  
54  
55  
56  
57  
58  
59  
60

Figure 1. Study population and intervention flow

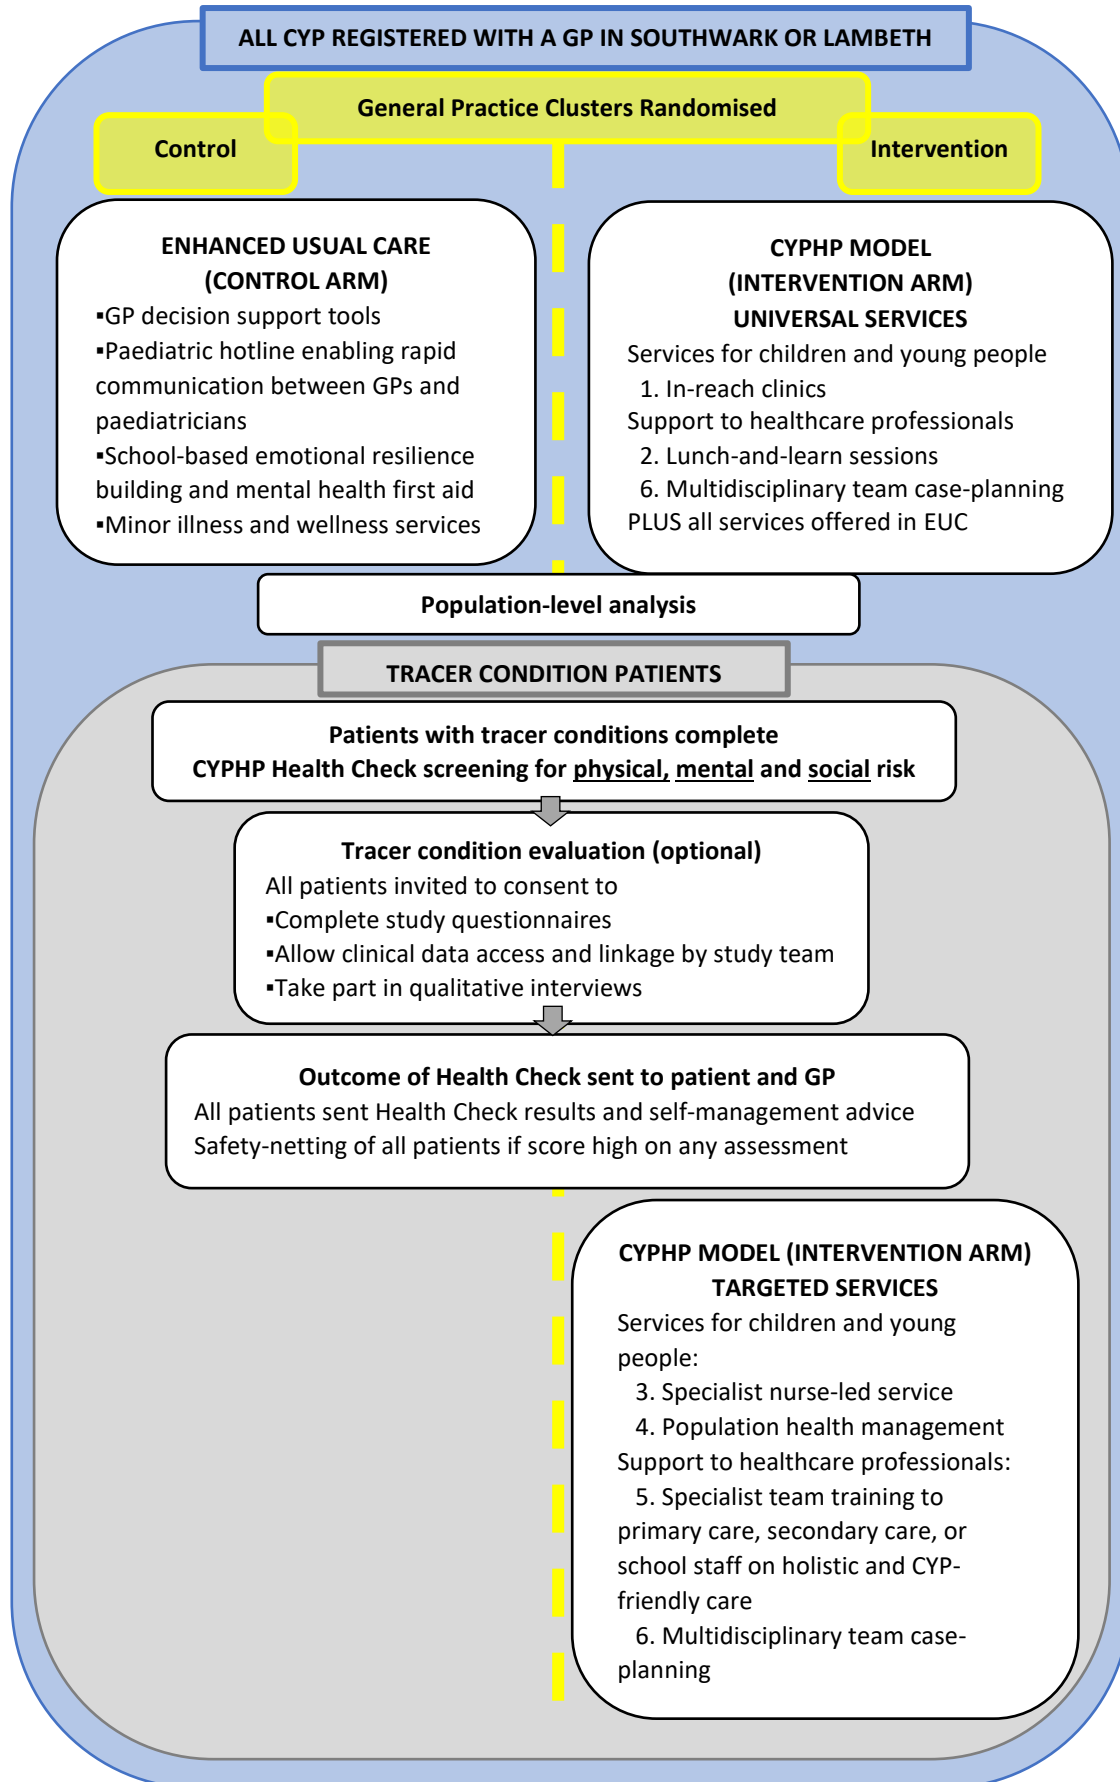

Supplement: bmjopen-2020-047085.draft_revisions.pdf [file bmjopen-2020-047085.draft_revisions.pdf]
